# Supplementary material for: A Comprehensive Analysis of the Effects of Key Mitophagy Genes on the Progression and Prognosis of Lung Adenocarcinoma
Source: MDPI journal article supplement (doi:10.3390/cancers15010057), 2022-12-22
Supplement: s1 [file s1]

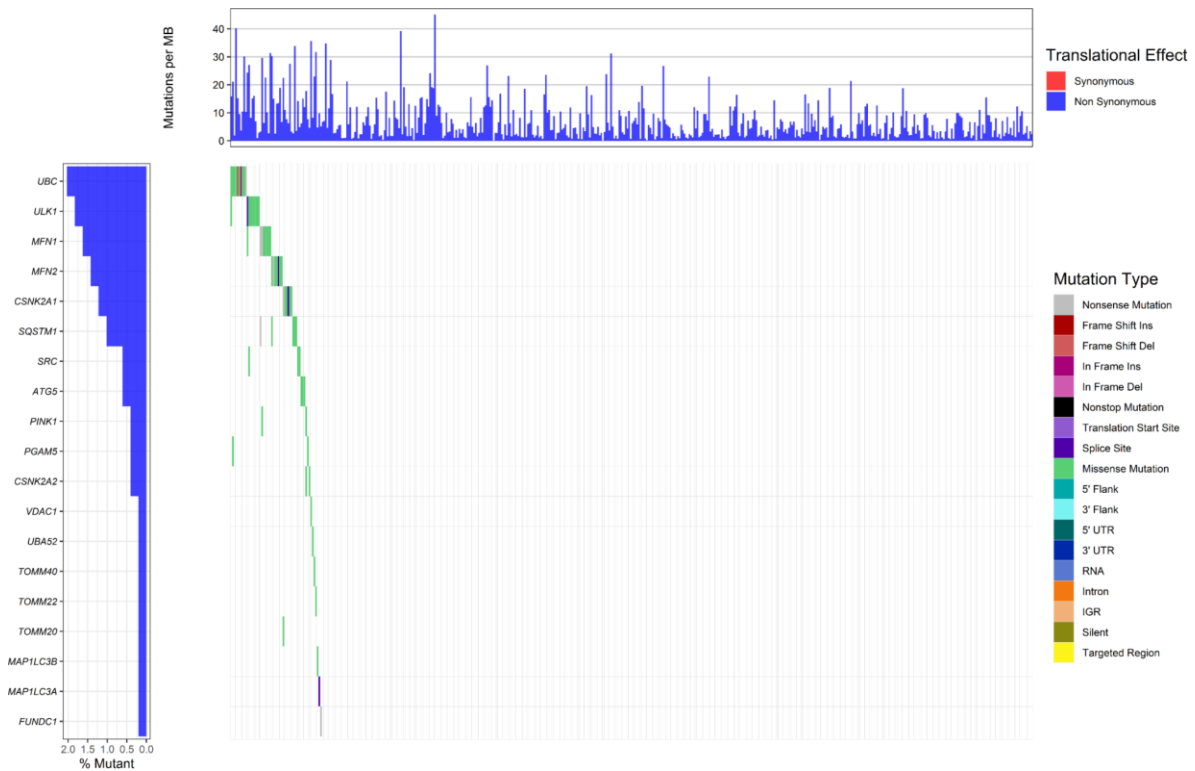

**Figure S1.** The landscape of mutation of mitophagy genes in LUAD. The mutation frequency of mitophagy gene in LUAD patients from TCGA. Each column represented individual patients. The upper barplot showed the number of mutations per Mb, and the mutation rate of each gene was listed on the left.

| Gene     | Loss (%) | Gain (%) |
|----------|----------|----------|
| ATG12    | 5.84     | 1.36     |
| ATG5     | 4.67     | 0.78     |
| CSNK2A1  | 6.23     | 1.75     |
| CSNK2A2  | 2.33     | 3.31     |
| CSNK2B   | 0.97     | 6.23     |
| FUNDC1   | 1.17     | 3.7      |
| MAP1LC3A | 2.92     | 5.25     |
| MAP1LC3B | 6.61     | 0.97     |
| MFN1     | 1.95     | 7.39     |
| MFN2     | 5.45     | 5.25     |
| MTERF3   | 2.33     | 10.7     |
| PGAM5    | 5.64     | 3.7      |
| PINK1    | 6.03     | 3.89     |
| PRKN     | 5.84     | 1.56     |
| RPS27A   | 1.36     | 3.31     |
| SQSTM1   | 3.11     | 7        |
| SRC      | 3.11     | 4.28     |
| TOMM20   | 2.14     | 5.84     |
| TOMM22   | 1.75     | 4.09     |
| TOMM40   | 4.28     | 7.39     |
| TOMM5    | 3.89     | 4.67     |
| TOMM7    | 0.78     | 6.42     |
| UBA52    | 1.95     | 2.92     |
| UBB      | 4.28     | 1.95     |
| UBC      | 5.06     | 3.31     |
| ULK1     | 5.84     | 4.28     |
| VDAC1    | 6.61     | 0.19     |

**Table S1.** The incidence rate of CNVs of mitophagy genes in TCGA-LUAD cohort.

| Gene     | Frequency |
|----------|-----------|
| UBC      | 2.03%     |
| ULK1     | 1.83%     |
| MFN1     | 1.63%     |
| MFN2     | 1.42%     |
| CSNK2A1  | 1.22%     |
| SQSTM1   | 1.02%     |
| ATG5     | 0.61%     |
| SRC      | 0.61%     |
| CSNK2A2  | 0.41%     |
| PGAM5    | 0.41%     |
| PINK1    | 0.41%     |
| FUNDC1   | 0.20%     |
| MAP1LC3A | 0.20%     |
| MAP1LC3B | 0.20%     |
| TOMM20   | 0.20%     |
| TOMM22   | 0.20%     |
| TOMM40   | 0.20%     |
| UBA52    | 0.20%     |
| VDAC1    | 0.20%     |
| ATG12    | 0.20%     |
| CSNK2B   | 0.00%     |
| MTERF3   | 0.00%     |
| PRKN     | 0.00%     |
| RPS27A   | 0.00%     |
| TOMM5    | 0.00%     |
| TOMM7    | 0.00%     |
| UBB      | 0.00%     |

**Table S2.** The incidence rate of mutations of mitophagy genes in TCGA-LUAD cohort.

| Gene  | logFC | t      | adj.P.Val              |
|-------|-------|--------|------------------------|
| BIRC5 | 1.86  | 15.08  | $9.84 \times 10^{-35}$ |
| UBE2C | 2.05  | 14.98  | $1.16 \times 10^{-34}$ |
| NUF2  | 1.81  | 14.57  | $3.26 \times 10^{-33}$ |
| CDCA5 | 1.62  | 14.51  | $3.94 \times 10^{-33}$ |
| AURKB | 1.74  | 14.49  | $3.94 \times 10^{-33}$ |
| TROAP | 1.80  | 14.45  | $3.96 \times 10^{-33}$ |
| CENPA | 1.90  | 14.45  | $3.96 \times 10^{-33}$ |
| MELK  | 1.86  | 14.39  | $6.09 \times 10^{-33}$ |
| DBF4  | 1.05  | 14.36  | $6.82 \times 10^{-33}$ |
| CDC20 | 1.73  | 14.21  | $2.26 \times 10^{-32}$ |
| TTK   | 1.76  | 14.19  | $2.61 \times 10^{-32}$ |
| EME1  | 1.49  | 13.99  | $1.33 \times 10^{-31}$ |
| CDKN3 | 1.72  | 13.95  | $1.78 \times 10^{-31}$ |
| DSCC1 | 1.41  | 13.91  | $2.25 \times 10^{-31}$ |
| CCNB2 | 1.51  | 13.85  | $3.68 \times 10^{-31}$ |
| AUNIP | 1.59  | 13.78  | $6.54 \times 10^{-31}$ |
| CDK1  | 1.52  | 13.73  | $9.18 \times 10^{-31}$ |
| KPNA2 | 1.19  | 13.72  | $9.32 \times 10^{-31}$ |
| SPC24 | 1.42  | 13.71  | $9.92 \times 10^{-31}$ |
| RFC4  | 1.13  | 13.68  | $1.29 \times 10^{-30}$ |
| MCM10 | 1.86  | 13.64  | $1.67 \times 10^{-30}$ |
| HJURP | 1.74  | 13.55  | $3.12 \times 10^{-30}$ |
| AURKA | 1.51  | 13.54  | $3.12 \times 10^{-30}$ |
| SKA3  | 1.59  | 13.56  | $3.11 \times 10^{-30}$ |
| MTBP  | 1.12  | 13.55  | $3.12 \times 10^{-30}$ |
| PRKN  | -1.57 | -13.56 | $3.09 \times 10^{-30}$ |
| CDC45 | 1.60  | 13.44  | $7.16 \times 10^{-30}$ |
| MTFR2 | 1.48  | 13.46  | $6.45 \times 10^{-30}$ |
| CDCA8 | 1.41  | 13.36  | $1.42 \times 10^{-29}$ |
| SKA1  | 1.73  | 13.36  | $1.41 \times 10^{-29}$ |
| CENPW | 1.44  | 13.34  | $1.59 \times 10^{-29}$ |
| TRAIP | 1.02  | 13.32  | $1.83 \times 10^{-29}$ |
| ORC6  | 1.37  | 13.30  | $2.17 \times 10^{-29}$ |
| CEP55 | 1.57  | 13.19  | $5.15 \times 10^{-29}$ |
| CCNB1 | 1.38  | 13.18  | $5.65 \times 10^{-29}$ |
| TPX2  | 1.70  | 13.16  | $6.52 \times 10^{-29}$ |

|          |       |        |                        |
|----------|-------|--------|------------------------|
| NDC80    | 1.62  | 13.15  | $6.52 \times 10^{-29}$ |
| TRIP13   | 1.60  | 13.14  | $6.95 \times 10^{-29}$ |
| PIMREG   | 1.71  | 13.13  | $7.71 \times 10^{-29}$ |
| KIF2C    | 1.60  | 13.10  | $9.56 \times 10^{-29}$ |
| CDCA3    | 1.47  | 13.08  | $1.15 \times 10^{-28}$ |
| CCNA2    | 1.47  | 13.02  | $1.76 \times 10^{-28}$ |
| KIF18B   | 1.71  | 12.99  | $2.30 \times 10^{-28}$ |
| SGO1     | 1.57  | 12.98  | $2.49 \times 10^{-28}$ |
| ARHGEF39 | 1.15  | 12.94  | $3.52 \times 10^{-28}$ |
| BUB1     | 1.49  | 12.91  | $4.29 \times 10^{-28}$ |
| KIF23    | 1.49  | 12.89  | $4.94 \times 10^{-28}$ |
| CHEK1    | 1.25  | 12.84  | $7.87 \times 10^{-28}$ |
| CDC6     | 1.52  | 12.83  | $8.04 \times 10^{-28}$ |
| RAD54B   | 1.09  | 12.79  | $1.17 \times 10^{-27}$ |
| TNS1     | -1.18 | -12.76 | $1.39 \times 10^{-27}$ |
| PLK4     | 1.25  | 12.76  | $1.42 \times 10^{-27}$ |
| NCAPG    | 1.62  | 12.75  | $1.46 \times 10^{-27}$ |
| SCN7A    | -2.02 | -12.75 | $1.45 \times 10^{-27}$ |
| SPAG5    | 1.35  | 12.73  | $1.70 \times 10^{-27}$ |
| SPC25    | 1.41  | 12.69  | $2.28 \times 10^{-27}$ |
| KIF15    | 1.44  | 12.68  | $2.48 \times 10^{-27}$ |
| PRR11    | 1.49  | 12.67  | $2.69 \times 10^{-27}$ |
| GIN51    | 1.34  | 12.60  | $4.29 \times 10^{-27}$ |
| NCAPH    | 1.52  | 12.60  | $4.29 \times 10^{-27}$ |
| CENPM    | 1.20  | 12.61  | $4.29 \times 10^{-27}$ |
| UBE2T    | 1.35  | 12.60  | $4.45 \times 10^{-27}$ |
| DEPDC1   | 1.76  | 12.57  | $5.56 \times 10^{-27}$ |
| POLE2    | 1.21  | 12.56  | $5.92 \times 10^{-27}$ |
| CKAP2L   | 1.57  | 12.50  | $9.79 \times 10^{-27}$ |
| XRCC2    | 1.41  | 12.50  | $1.00 \times 10^{-26}$ |
| ASF1B    | 1.24  | 12.48  | $1.16 \times 10^{-26}$ |
| DEPDC1B  | 1.61  | 12.48  | $1.12 \times 10^{-26}$ |
| KIF4A    | 1.61  | 12.46  | $1.26 \times 10^{-26}$ |
| MYBL2    | 1.86  | 12.46  | $1.29 \times 10^{-26}$ |
| DLGAP5   | 1.64  | 12.46  | $1.29 \times 10^{-26}$ |
| RAI2     | -1.16 | -12.43 | $1.58 \times 10^{-26}$ |
| C1QTNF7  | -1.97 | -12.46 | $1.30 \times 10^{-26}$ |
| TK1      | 1.33  | 12.39  | $2.19 \times 10^{-26}$ |
| NEK2     | 1.59  | 12.37  | $2.60 \times 10^{-26}$ |
| RAD51AP1 | 1.35  | 12.34  | $3.27 \times 10^{-26}$ |
| PSRC1    | 1.10  | 12.34  | $3.27 \times 10^{-26}$ |
| POC1A    | 1.00  | 12.33  | $3.39 \times 10^{-26}$ |
| RAD51    | 1.32  | 12.33  | $3.51 \times 10^{-26}$ |
| C5orf34  | 1.17  | 12.31  | $4.16 \times 10^{-26}$ |
| SAPCD2   | 1.43  | 12.26  | $6.00 \times 10^{-26}$ |
| CENPK    | 1.26  | 12.22  | $8.56 \times 10^{-26}$ |
| GTSE1    | 1.41  | 12.19  | $1.08 \times 10^{-25}$ |
| PARBP    | 1.28  | 12.18  | $1.17 \times 10^{-25}$ |
| RAD54L   | 1.49  | 12.15  | $1.39 \times 10^{-25}$ |
| CDC25A   | 1.37  | 12.11  | $1.93 \times 10^{-25}$ |
| FAM72A   | 1.45  | 12.12  | $1.86 \times 10^{-25}$ |
| DPYSL2   | -1.04 | -12.05 | $3.36 \times 10^{-25}$ |
| UBE2S    | 1.23  | 12.04  | $3.62 \times 10^{-25}$ |
| ZWINT    | 1.19  | 12.03  | $3.63 \times 10^{-25}$ |
| FAM72D   | 1.73  | 12.06  | $2.94 \times 10^{-25}$ |
| CENPE    | 1.43  | 11.95  | $6.92 \times 10^{-25}$ |
| CDC25C   | 1.49  | 11.95  | $7.03 \times 10^{-25}$ |
| FAM72B   | 1.65  | 11.97  | $5.83 \times 10^{-25}$ |
| SGO2     | 1.14  | 11.93  | $8.02 \times 10^{-25}$ |
| CKS2     | 1.22  | 11.88  | $1.22 \times 10^{-24}$ |
| EZH2     | 1.09  | 11.87  | $1.24 \times 10^{-24}$ |
| CDCA2    | 1.45  | 11.88  | $1.22 \times 10^{-24}$ |
| MAD2L1   | 1.35  | 11.85  | $1.45 \times 10^{-24}$ |
| PLK1     | 1.31  | 11.84  | $1.59 \times 10^{-24}$ |
| C17orf53 | 1.32  | 11.84  | $1.52 \times 10^{-24}$ |
| TEDC2    | 1.18  | 11.83  | $1.66 \times 10^{-24}$ |
| EXO1     | 1.56  | 11.81  | $2.02 \times 10^{-24}$ |
| KIFC1    | 1.39  | 11.80  | $2.13 \times 10^{-24}$ |
| PCLAF    | 1.32  | 11.80  | $2.14 \times 10^{-24}$ |

|            |       |        |                        |
|------------|-------|--------|------------------------|
| ELN        | -1.74 | -11.76 | $2.79 \times 10^{-24}$ |
| FANCB      | 1.23  | 11.79  | $2.26 \times 10^{-24}$ |
| CIP2A      | 1.32  | 11.74  | $3.31 \times 10^{-24}$ |
| CCNE1      | 1.48  | 11.71  | $4.20 \times 10^{-24}$ |
| ANLN       | 1.60  | 11.70  | $4.39 \times 10^{-24}$ |
| KIF20A     | 1.32  | 11.70  | $4.49 \times 10^{-24}$ |
| POLQ       | 1.52  | 11.70  | $4.39 \times 10^{-24}$ |
| STIL       | 1.08  | 11.69  | $4.77 \times 10^{-24}$ |
| KIF11      | 1.23  | 11.65  | $6.75 \times 10^{-24}$ |
| ORC1       | 1.40  | 11.59  | $1.08 \times 10^{-23}$ |
| BUB1B      | 1.40  | 11.58  | $1.13 \times 10^{-23}$ |
| ADAMTS8    | -2.09 | -11.60 | $1.02 \times 10^{-23}$ |
| KIF14      | 1.56  | 11.57  | $1.26 \times 10^{-23}$ |
| NUSAP1     | 1.19  | 11.55  | $1.38 \times 10^{-23}$ |
| HASPIN     | 1.32  | 11.54  | $1.52 \times 10^{-23}$ |
| OIP5       | 1.39  | 11.54  | $1.52 \times 10^{-23}$ |
| TOP2A      | 1.45  | 11.52  | $1.84 \times 10^{-23}$ |
| PKMYT1     | 1.35  | 11.51  | $1.94 \times 10^{-23}$ |
| PRC1       | 1.19  | 11.48  | $2.42 \times 10^{-23}$ |
| RACGAP1    | 1.05  | 11.46  | $2.87 \times 10^{-23}$ |
| PIF1       | 1.38  | 11.45  | $3.12 \times 10^{-23}$ |
| ITGA8      | -1.38 | -11.44 | $3.42 \times 10^{-23}$ |
| ASPM       | 1.52  | 11.43  | $3.54 \times 10^{-23}$ |
| RRM2       | 1.42  | 11.43  | $3.57 \times 10^{-23}$ |
| ABCA8      | -1.86 | -11.39 | $4.68 \times 10^{-23}$ |
| CENPI      | 1.39  | 11.39  | $4.94 \times 10^{-23}$ |
| MCM4       | 1.08  | 11.37  | $5.68 \times 10^{-23}$ |
| CDT1       | 1.28  | 11.33  | $7.55 \times 10^{-23}$ |
| KIF18A     | 1.14  | 11.31  | $8.82 \times 10^{-23}$ |
| ROBO2      | -2.03 | -11.30 | $9.47 \times 10^{-23}$ |
| TICRR      | 1.41  | 11.30  | $9.94 \times 10^{-23}$ |
| AC099850.3 | 1.52  | 11.28  | $1.17 \times 10^{-22}$ |
| SCN4B      | -1.50 | -11.24 | $1.49 \times 10^{-22}$ |
| MND1       | 1.20  | 11.19  | $2.26 \times 10^{-22}$ |
| ESPL1      | 1.46  | 11.18  | $2.49 \times 10^{-22}$ |
| INMT       | -1.82 | -11.16 | $2.75 \times 10^{-22}$ |
| ADAMTSL2   | -1.14 | -11.16 | $2.91 \times 10^{-22}$ |
| RECQL4     | 1.22  | 11.14  | $3.33 \times 10^{-22}$ |
| HMMR       | 1.36  | 11.10  | $4.60 \times 10^{-22}$ |
| FOXM1      | 1.45  | 11.06  | $6.36 \times 10^{-22}$ |
| AC012073.1 | 1.03  | 11.08  | $5.41 \times 10^{-22}$ |
| MFAP4      | -1.67 | -11.03 | $8.03 \times 10^{-22}$ |
| CCNE2      | 1.13  | 10.96  | $1.40 \times 10^{-21}$ |
| ECE2       | 1.00  | 10.94  | $1.54 \times 10^{-21}$ |
| GINS4      | 1.23  | 10.94  | $1.54 \times 10^{-21}$ |
| MGP        | -1.36 | -10.91 | $2.06 \times 10^{-21}$ |
| ATP1A2     | -1.93 | -10.92 | $1.90 \times 10^{-21}$ |
| EIF4EBP1   | 1.12  | 10.86  | $2.91 \times 10^{-21}$ |
| HELLS      | 1.07  | 10.86  | $2.98 \times 10^{-21}$ |
| BRCA1      | 1.11  | 10.85  | $3.19 \times 10^{-21}$ |
| MYOCD      | -1.90 | -10.87 | $2.75 \times 10^{-21}$ |
| MAP6D1     | 1.12  | 10.85  | $3.22 \times 10^{-21}$ |
| DDIAS      | 1.29  | 10.82  | $3.98 \times 10^{-21}$ |
| MYH11      | -1.65 | -10.81 | $4.13 \times 10^{-21}$ |
| BRIP1      | 1.21  | 10.77  | $5.74 \times 10^{-21}$ |
| NFIX       | -1.23 | -10.75 | $6.76 \times 10^{-21}$ |
| ATAD2      | 1.02  | 10.73  | $7.70 \times 10^{-21}$ |
| TYMS       | 1.03  | 10.71  | $8.98 \times 10^{-21}$ |
| AOC3       | -1.24 | -10.71 | $9.19 \times 10^{-21}$ |
| KNL1       | 1.22  | 10.66  | $1.33 \times 10^{-20}$ |
| DNA2       | 1.03  | 10.65  | $1.43 \times 10^{-20}$ |
| PBK        | 1.57  | 10.64  | $1.58 \times 10^{-20}$ |
| HMCN1      | -1.29 | -10.58 | $2.42 \times 10^{-20}$ |
| NR3C2      | -1.42 | -10.56 | $2.78 \times 10^{-20}$ |
| LAMA2      | -1.10 | -10.56 | $2.80 \times 10^{-20}$ |
| CCDC150    | 1.23  | 10.52  | $3.68 \times 10^{-20}$ |
| WDHD1      | 1.00  | 10.49  | $4.58 \times 10^{-20}$ |
| SHCBP1     | 1.15  | 10.49  | $4.60 \times 10^{-20}$ |
| MAMDC2     | -1.73 | -10.49 | $4.58 \times 10^{-20}$ |

|            |       |        |                        |
|------------|-------|--------|------------------------|
| SGCA       | -1.46 | -10.49 | $4.60 \times 10^{-20}$ |
| ARHGAP11A  | 1.13  | 10.45  | $6.43 \times 10^{-20}$ |
| ERCC6L     | 1.23  | 10.45  | $6.46 \times 10^{-20}$ |
| A2M        | -1.20 | -10.48 | $5.20 \times 10^{-20}$ |
| ADH1B      | -2.88 | -10.40 | $9.20 \times 10^{-20}$ |
| SLIT3      | -1.52 | -10.38 | $1.07 \times 10^{-19}$ |
| NTRK3      | -1.50 | -10.39 | $9.71 \times 10^{-20}$ |
| ITGA9      | -1.21 | -10.37 | $1.14 \times 10^{-19}$ |
| SNED1      | -1.01 | -10.37 | $1.16 \times 10^{-19}$ |
| E2F1       | 1.11  | 10.31  | $1.86 \times 10^{-19}$ |
| C7         | -2.15 | -10.29 | $2.05 \times 10^{-19}$ |
| TBX4       | -1.45 | -10.26 | $2.59 \times 10^{-19}$ |
| UHRF1      | 1.26  | 10.24  | $2.94 \times 10^{-19}$ |
| CENPU      | 1.11  | 10.20  | $4.09 \times 10^{-19}$ |
| DIAPH3     | 1.22  | 10.19  | $4.25 \times 10^{-19}$ |
| GFRA1      | -1.93 | -10.15 | $6.00 \times 10^{-19}$ |
| PTTG1      | 1.14  | 10.11  | $8.29 \times 10^{-19}$ |
| ESCO2      | 1.20  | 10.11  | $8.29 \times 10^{-19}$ |
| ITIH5      | -1.53 | -10.10 | $8.39 \times 10^{-19}$ |
| SPARCL1    | -1.05 | -10.10 | $8.82 \times 10^{-19}$ |
| PSAT1      | 1.41  | 10.07  | $1.03 \times 10^{-18}$ |
| TBX5-AS1   | -1.10 | -10.06 | $1.12 \times 10^{-18}$ |
| FAM72C     | 1.73  | 10.05  | $1.17 \times 10^{-18}$ |
| SPATA18    | -1.77 | -9.99  | $1.84 \times 10^{-18}$ |
| WDR62      | 1.19  | 9.98   | $1.96 \times 10^{-18}$ |
| CTSV       | 1.70  | 9.96   | $2.35 \times 10^{-18}$ |
| GIN5       | 1.16  | 9.96   | $2.41 \times 10^{-18}$ |
| GRIA1      | -2.35 | -9.97  | $2.16 \times 10^{-18}$ |
| TMEM132E   | -1.64 | -9.93  | $3.00 \times 10^{-18}$ |
| AC120049.1 | -1.02 | -9.92  | $3.21 \times 10^{-18}$ |
| FENDRR     | -1.62 | -9.86  | $4.82 \times 10^{-18}$ |
| HPSE2      | -1.96 | -9.87  | $4.32 \times 10^{-18}$ |
| PODN       | -1.14 | -9.85  | $5.19 \times 10^{-18}$ |
| LTBP2      | -1.13 | -9.86  | $4.82 \times 10^{-18}$ |
| CFAP221    | -1.85 | -9.79  | $8.11 \times 10^{-18}$ |
| CGNL1      | -1.05 | -9.74  | $1.18 \times 10^{-17}$ |
| SHROOM4    | -1.09 | -9.70  | $1.59 \times 10^{-17}$ |
| ACRV1      | 1.41  | 9.69   | $1.62 \times 10^{-17}$ |
| DTL        | 1.07  | 9.65   | $2.29 \times 10^{-17}$ |
| PGR        | -1.21 | -9.65  | $2.21 \times 10^{-17}$ |
| E2F2       | 1.08  | 9.59   | $3.45 \times 10^{-17}$ |
| CYP4B1     | -2.62 | -9.58  | $3.84 \times 10^{-17}$ |
| NEIL3      | 1.60  | 9.52   | $5.58 \times 10^{-17}$ |
| SLC5A9     | -1.57 | -9.53  | $5.28 \times 10^{-17}$ |
| PKNOX2     | -1.22 | -9.51  | $6.18 \times 10^{-17}$ |
| VWF        | -1.13 | -9.51  | $5.98 \times 10^{-17}$ |
| IQGAP3     | 1.15  | 9.49   | $6.98 \times 10^{-17}$ |
| FGF14      | -1.19 | -9.49  | $7.09 \times 10^{-17}$ |
| RPL39L     | 1.30  | 9.48   | $7.44 \times 10^{-17}$ |
| RSPO2      | -2.29 | -9.48  | $7.23 \times 10^{-17}$ |
| HSPB7      | -1.11 | -9.41  | $1.20 \times 10^{-16}$ |
| SULT1C4    | -1.08 | -9.42  | $1.16 \times 10^{-16}$ |
| LPAL2      | -1.45 | -9.42  | $1.15 \times 10^{-16}$ |
| MAOB       | -1.26 | -9.40  | $1.30 \times 10^{-16}$ |
| POLR3G     | 1.01  | 9.38   | $1.53 \times 10^{-16}$ |
| PHACTR1    | -1.05 | -9.37  | $1.55 \times 10^{-16}$ |
| ASPA       | -1.24 | -9.39  | $1.44 \times 10^{-16}$ |
| CACNA2D2   | -2.20 | -9.37  | $1.55 \times 10^{-16}$ |
| ATP5BPB5   | -1.28 | -9.38  | $1.47 \times 10^{-16}$ |
| UBE2SP1    | 1.38  | 9.36   | $1.65 \times 10^{-16}$ |
| FAM83D     | 1.24  | 9.34   | $2.01 \times 10^{-16}$ |
| RCAN2      | -1.14 | -9.33  | $2.06 \times 10^{-16}$ |
| TCF21      | -1.47 | -9.33  | $2.13 \times 10^{-16}$ |
| ADAMTSL3   | -1.23 | -9.33  | $2.15 \times 10^{-16}$ |
| RAP1GAP    | -1.58 | -9.33  | $2.15 \times 10^{-16}$ |
| SLC22A3    | -1.91 | -9.29  | $2.89 \times 10^{-16}$ |
| FBXO43     | 1.13  | 9.29   | $2.72 \times 10^{-16}$ |
| ZBTB16     | -2.22 | -9.28  | $3.03 \times 10^{-16}$ |
| PRDM6      | -1.03 | -9.27  | $3.11 \times 10^{-16}$ |

|            |       |       |                        |
|------------|-------|-------|------------------------|
| CENPF      | 1.24  | 9.28  | $2.98 \times 10^{-16}$ |
| VEGFD      | -2.28 | -9.27 | $3.08 \times 10^{-16}$ |
| GPR19      | 1.22  | 9.28  | $3.04 \times 10^{-16}$ |
| F11        | -2.70 | -9.28 | $3.04 \times 10^{-16}$ |
| NDNF       | -1.80 | -9.22 | $4.39 \times 10^{-16}$ |
| KCND3      | -1.30 | -9.18 | $5.73 \times 10^{-16}$ |
| CORO2B     | -1.07 | -9.18 | $6.10 \times 10^{-16}$ |
| CYBRD1     | -1.09 | -9.20 | $5.33 \times 10^{-16}$ |
| C16orf89   | -2.47 | -9.19 | $5.58 \times 10^{-16}$ |
| LMOD1      | -1.01 | -9.17 | $6.34 \times 10^{-16}$ |
| AC236972.3 | -2.49 | -9.19 | $5.68 \times 10^{-16}$ |
| DLC1       | -1.24 | -9.13 | $8.18 \times 10^{-16}$ |
| SLC44A4    | -1.40 | -9.14 | $7.85 \times 10^{-16}$ |
| TYMSOS     | 1.22  | 9.10  | $9.99 \times 10^{-16}$ |
| DNMT3B     | 1.09  | 9.06  | $1.35 \times 10^{-15}$ |
| VWA2       | -1.33 | -9.06 | $1.35 \times 10^{-15}$ |
| LINC00337  | 1.66  | 9.08  | $1.22 \times 10^{-15}$ |
| LINC01936  | -1.25 | -9.05 | $1.40 \times 10^{-15}$ |
| LINC00261  | -2.63 | -9.04 | $1.52 \times 10^{-15}$ |
| ABI3BP     | -1.28 | -9.05 | $1.49 \times 10^{-15}$ |
| ART4       | -1.49 | -9.04 | $1.51 \times 10^{-15}$ |
| FHL1       | -1.25 | -9.02 | $1.75 \times 10^{-15}$ |
| LINC00634  | 1.62  | 9.04  | $1.60 \times 10^{-15}$ |
| KCNA5      | -1.24 | -9.01 | $1.96 \times 10^{-15}$ |
| HLF        | -1.73 | -8.98 | $2.32 \times 10^{-15}$ |
| C2orf40    | -2.22 | -8.99 | $2.24 \times 10^{-15}$ |
| PCDH20     | -2.08 | -8.98 | $2.30 \times 10^{-15}$ |
| AC023509.2 | -1.63 | -8.97 | $2.46 \times 10^{-15}$ |
| CLSPN      | 1.25  | 8.93  | $3.28 \times 10^{-15}$ |
| ADGRF5     | -1.43 | -8.94 | $3.08 \times 10^{-15}$ |
| PLA2G1B    | -2.48 | -8.90 | $3.88 \times 10^{-15}$ |
| LINC00940  | -1.97 | -8.88 | $4.58 \times 10^{-15}$ |
| FOXA2      | -2.17 | -8.87 | $4.80 \times 10^{-15}$ |
| MAP6       | -1.13 | -8.86 | $5.32 \times 10^{-15}$ |
| EDNRB      | -1.13 | -8.86 | $5.37 \times 10^{-15}$ |
| CX3CR1     | -1.52 | -8.85 | $5.50 \times 10^{-15}$ |
| TNXB       | -1.44 | -8.85 | $5.50 \times 10^{-15}$ |
| PRELP      | -1.19 | -8.86 | $5.18 \times 10^{-15}$ |
| MKI67      | 1.20  | 8.83  | $6.30 \times 10^{-15}$ |
| PLXNA2     | -1.06 | -8.83 | $6.45 \times 10^{-15}$ |
| TESMIN     | 1.53  | 8.80  | $8.00 \times 10^{-15}$ |
| BTG2       | -1.02 | -8.82 | $6.78 \times 10^{-15}$ |
| HPDL       | 1.63  | 8.78  | $8.86 \times 10^{-15}$ |
| FMO2       | -1.26 | -8.78 | $9.06 \times 10^{-15}$ |
| MEGF6      | -1.09 | -8.78 | $9.20 \times 10^{-15}$ |
| NEGR1      | -1.30 | -8.71 | $1.46 \times 10^{-14}$ |
| MS4A2      | -1.56 | -8.68 | $1.75 \times 10^{-14}$ |
| RHOBTB2    | -1.16 | -8.71 | $1.50 \times 10^{-14}$ |
| SELENBP1   | -1.36 | -8.71 | $1.46 \times 10^{-14}$ |
| KLHL33     | -1.29 | -8.69 | $1.63 \times 10^{-14}$ |
| FXYD1      | -1.14 | -8.65 | $2.16 \times 10^{-14}$ |
| EDA2R      | -1.51 | -8.63 | $2.44 \times 10^{-14}$ |
| CRTAC1     | -2.00 | -8.63 | $2.50 \times 10^{-14}$ |
| CAV3       | -1.54 | -8.62 | $2.61 \times 10^{-14}$ |
| CCL14      | -1.58 | -8.63 | $2.58 \times 10^{-14}$ |
| CHRD1      | -1.75 | -8.62 | $2.68 \times 10^{-14}$ |
| SVEP1      | -1.23 | -8.61 | $2.90 \times 10^{-14}$ |
| CST5       | -1.90 | -8.61 | $2.76 \times 10^{-14}$ |
| FAM111B    | 1.09  | 8.59  | $3.14 \times 10^{-14}$ |
| SHH        | -1.91 | -8.58 | $3.44 \times 10^{-14}$ |
| LINC01266  | -1.24 | -8.59 | $3.20 \times 10^{-14}$ |
| SCN11A     | -1.17 | -8.59 | $3.32 \times 10^{-14}$ |
| DDN        | 1.54  | 8.56  | $3.85 \times 10^{-14}$ |
| RDM1       | 1.33  | 8.54  | $4.39 \times 10^{-14}$ |
| CYP4Z2P    | -2.15 | -8.55 | $4.13 \times 10^{-14}$ |
| SCTR       | -2.39 | -8.53 | $4.92 \times 10^{-14}$ |
| SLC8A3     | -1.30 | -8.54 | $4.57 \times 10^{-14}$ |
| PEBP4      | -2.53 | -8.51 | $5.28 \times 10^{-14}$ |
| BTNL9      | -1.37 | -8.50 | $5.60 \times 10^{-14}$ |

|             |       |       |                        |
|-------------|-------|-------|------------------------|
| CASQ2       | -1.55 | -8.51 | $5.31 \times 10^{-14}$ |
| E2F7        | 1.28  | 8.50  | $5.90 \times 10^{-14}$ |
| UNC45B      | -1.18 | -8.51 | $5.47 \times 10^{-14}$ |
| CLEC4F      | -1.69 | -8.50 | $5.69 \times 10^{-14}$ |
| FOLR1       | -2.00 | -8.51 | $5.50 \times 10^{-14}$ |
| FHL5        | -1.21 | -8.47 | $7.03 \times 10^{-14}$ |
| C8orf34     | -1.51 | -8.47 | $7.06 \times 10^{-14}$ |
| AC091948.1  | -1.14 | -8.48 | $6.63 \times 10^{-14}$ |
| E2F8        | 1.03  | 8.45  | $8.24 \times 10^{-14}$ |
| INSYN1      | -1.42 | -8.44 | $8.57 \times 10^{-14}$ |
| SELENOP     | -1.09 | -8.46 | $7.36 \times 10^{-14}$ |
| VWC2        | -1.49 | -8.46 | $7.69 \times 10^{-14}$ |
| FCER1A      | -2.04 | -8.42 | $1.01 \times 10^{-13}$ |
| MACROD2     | -1.71 | -8.41 | $1.02 \times 10^{-13}$ |
| ADAMTS7P3   | -1.64 | -8.42 | $9.87 \times 10^{-14}$ |
| SFTPD       | -2.29 | -8.41 | $1.02 \times 10^{-13}$ |
| AC073585.1  | 1.26  | 8.37  | $1.35 \times 10^{-13}$ |
| AR          | -1.34 | -8.37 | $1.40 \times 10^{-13}$ |
| ERBB4       | -1.77 | -8.36 | $1.42 \times 10^{-13}$ |
| MAPK10      | -1.20 | -8.35 | $1.58 \times 10^{-13}$ |
| NPM1P9      | 1.01  | 8.36  | $1.45 \times 10^{-13}$ |
| GATA5       | -1.37 | -8.34 | $1.68 \times 10^{-13}$ |
| TMEM132D    | -2.70 | -8.33 | $1.71 \times 10^{-13}$ |
| AC022164.1  | -1.28 | -8.32 | $1.90 \times 10^{-13}$ |
| CTSG        | -1.82 | -8.29 | $2.22 \times 10^{-13}$ |
| GPIHBP1     | -1.43 | -8.28 | $2.44 \times 10^{-13}$ |
| LINC01354   | -1.30 | -8.26 | $2.75 \times 10^{-13}$ |
| SFTPB       | -2.36 | -8.35 | $1.54 \times 10^{-13}$ |
| CPA3        | -1.55 | -8.24 | $3.12 \times 10^{-13}$ |
| PARM1       | -1.27 | -8.25 | $2.85 \times 10^{-13}$ |
| CD300LG     | -1.97 | -8.23 | $3.40 \times 10^{-13}$ |
| PLAC1       | 1.96  | 8.21  | $3.71 \times 10^{-13}$ |
| ADGRF5P2    | -1.49 | -8.22 | $3.59 \times 10^{-13}$ |
| ROS1        | -1.89 | -8.22 | $3.59 \times 10^{-13}$ |
| FPGT-TNNI3K | -1.23 | -8.19 | $4.18 \times 10^{-13}$ |
| CASR        | -2.42 | -8.19 | $4.15 \times 10^{-13}$ |
| AL138789.1  | 1.48  | 8.18  | $4.40 \times 10^{-13}$ |
| GDF10       | -1.61 | -8.17 | $4.82 \times 10^{-13}$ |
| PRDM16      | -1.68 | -8.17 | $4.79 \times 10^{-13}$ |
| C1orf116    | -1.48 | -8.19 | $4.20 \times 10^{-13}$ |
| LINC00968   | -1.31 | -8.15 | $5.60 \times 10^{-13}$ |
| FAT4        | -1.02 | -8.14 | $5.98 \times 10^{-13}$ |
| ABCA3       | -1.52 | -8.13 | $6.11 \times 10^{-13}$ |
| GALNT17     | -1.45 | -8.08 | $8.49 \times 10^{-13}$ |
| LARGE1      | -1.05 | -8.09 | $8.34 \times 10^{-13}$ |
| GGTLC1      | -2.43 | -8.06 | $9.76 \times 10^{-13}$ |
| LINC02519   | -1.28 | -8.06 | $9.53 \times 10^{-13}$ |
| TMPRSS2     | -1.31 | -8.09 | $8.26 \times 10^{-13}$ |
| CPAMD8      | -1.57 | -8.06 | $9.63 \times 10^{-13}$ |
| ANGPT1      | -1.16 | -8.05 | $1.04 \times 10^{-12}$ |
| UBE2SP2     | 1.33  | 8.06  | $9.88 \times 10^{-13}$ |
| ADH1A       | -1.38 | -8.03 | $1.15 \times 10^{-12}$ |
| AFF3        | -1.43 | -8.02 | $1.24 \times 10^{-12}$ |
| ZNF366      | -1.00 | -8.02 | $1.25 \times 10^{-12}$ |
| TSACC       | 1.05  | 8.02  | $1.25 \times 10^{-12}$ |
| KBTBD11     | -1.09 | -8.02 | $1.25 \times 10^{-12}$ |
| C8orf34-AS1 | -2.23 | -8.02 | $1.29 \times 10^{-12}$ |
| CYP2B7P     | -2.06 | -8.04 | $1.12 \times 10^{-12}$ |
| SLC26A9     | -2.11 | -8.02 | $1.25 \times 10^{-12}$ |
| GJB1        | -2.60 | -8.00 | $1.41 \times 10^{-12}$ |
| LINC00982   | -1.80 | -8.00 | $1.42 \times 10^{-12}$ |
| NAPSA       | -2.14 | -8.07 | $9.30 \times 10^{-13}$ |
| FGF10       | -1.69 | -7.99 | $1.48 \times 10^{-12}$ |
| DUOX1       | -1.47 | -7.99 | $1.52 \times 10^{-12}$ |
| ATP13A4     | -1.91 | -7.98 | $1.67 \times 10^{-12}$ |
| SSTR1       | -1.73 | -7.96 | $1.79 \times 10^{-12}$ |
| OGN         | -1.73 | -7.96 | $1.85 \times 10^{-12}$ |
| C4BPA       | -2.12 | -7.96 | $1.81 \times 10^{-12}$ |
| ZNF887P     | 1.08  | 7.94  | $2.06 \times 10^{-12}$ |

|            |       |       |                        |
|------------|-------|-------|------------------------|
| HPGDS      | -1.35 | -7.90 | $2.77 \times 10^{-12}$ |
| ACADL      | -1.78 | -7.89 | $2.88 \times 10^{-12}$ |
| KCNQ1      | -1.17 | -7.90 | $2.68 \times 10^{-12}$ |
| AP001189.1 | -1.09 | -7.89 | $2.88 \times 10^{-12}$ |
| AL138900.2 | -1.83 | -7.88 | $3.10 \times 10^{-12}$ |
| SUSD2      | -1.82 | -7.87 | $3.22 \times 10^{-12}$ |
| ALKAL2     | -1.29 | -7.84 | $3.95 \times 10^{-12}$ |
| ACTN2      | -1.15 | -7.84 | $4.04 \times 10^{-12}$ |
| CLDN18     | -3.00 | -7.82 | $4.40 \times 10^{-12}$ |
| SMCO3      | -1.00 | -7.80 | $5.11 \times 10^{-12}$ |
| TNR        | -1.43 | -7.79 | $5.33 \times 10^{-12}$ |
| LRRK2      | -1.67 | -7.81 | $4.90 \times 10^{-12}$ |
| MYOM2      | -1.11 | -7.78 | $5.71 \times 10^{-12}$ |
| ADRA1A     | -1.62 | -7.78 | $5.54 \times 10^{-12}$ |
| PTPRU      | -1.06 | -7.80 | $5.09 \times 10^{-12}$ |
| AC096531.2 | -1.84 | -7.77 | $5.86 \times 10^{-12}$ |
| AC005884.1 | -1.24 | -7.77 | $6.11 \times 10^{-12}$ |
| SCGB3A2    | -2.93 | -7.78 | $5.53 \times 10^{-12}$ |
| ADGRD1     | -1.37 | -7.77 | $5.94 \times 10^{-12}$ |
| AC037441.1 | -1.60 | -7.77 | $6.14 \times 10^{-12}$ |
| COLEC12    | -1.09 | -7.77 | $6.07 \times 10^{-12}$ |
| FAM107A    | -1.26 | -7.75 | $6.94 \times 10^{-12}$ |
| SCN2B      | -1.32 | -7.73 | $7.68 \times 10^{-12}$ |
| PTCHD4     | -1.57 | -7.72 | $8.21 \times 10^{-12}$ |
| B3GALT2    | -1.33 | -7.71 | $8.47 \times 10^{-12}$ |
| PGM5       | -1.12 | -7.72 | $8.30 \times 10^{-12}$ |
| CNTN6      | -1.82 | -7.68 | $1.04 \times 10^{-11}$ |
| PRG4       | -1.79 | -7.68 | $1.06 \times 10^{-11}$ |
| SPTLC3     | -1.25 | -7.69 | $1.00 \times 10^{-11}$ |
| CTXND1     | -1.51 | -7.67 | $1.09 \times 10^{-11}$ |
| ZNF695     | 1.85  | 7.67  | $1.12 \times 10^{-11}$ |
| LINC02038  | -1.91 | -7.66 | $1.16 \times 10^{-11}$ |
| CD1E       | -1.69 | -7.66 | $1.19 \times 10^{-11}$ |
| SEC14L6    | -1.47 | -7.65 | $1.22 \times 10^{-11}$ |
| C9orf152   | -1.43 | -7.66 | $1.17 \times 10^{-11}$ |
| VSIG2      | -1.87 | -7.66 | $1.21 \times 10^{-11}$ |
| AC093797.1 | -1.38 | -7.64 | $1.30 \times 10^{-11}$ |
| PACRG      | -1.62 | -7.64 | $1.33 \times 10^{-11}$ |
| RSP01      | -1.36 | -7.64 | $1.32 \times 10^{-11}$ |
| MEOX2      | -1.04 | -7.62 | $1.49 \times 10^{-11}$ |
| HMCN2      | -1.22 | -7.61 | $1.59 \times 10^{-11}$ |
| COL14A1    | -1.17 | -7.63 | $1.39 \times 10^{-11}$ |
| TMEM252    | -1.42 | -7.61 | $1.62 \times 10^{-11}$ |
| AC090092.1 | -1.22 | -7.61 | $1.65 \times 10^{-11}$ |
| LHFPL3-AS2 | -2.19 | -7.58 | $1.89 \times 10^{-11}$ |
| DUOXA1     | -1.50 | -7.58 | $1.88 \times 10^{-11}$ |
| TMEM132C   | -1.84 | -7.57 | $2.01 \times 10^{-11}$ |
| PLCXD3     | -1.66 | -7.56 | $2.17 \times 10^{-11}$ |
| TMEM163    | -1.33 | -7.58 | $1.95 \times 10^{-11}$ |
| AC135012.3 | -1.29 | -7.56 | $2.16 \times 10^{-11}$ |
| DIO3OS     | -1.62 | -7.55 | $2.25 \times 10^{-11}$ |
| AL157996.1 | -1.28 | -7.54 | $2.40 \times 10^{-11}$ |
| C4B        | -1.17 | -7.54 | $2.44 \times 10^{-11}$ |
| RPL13AP17  | -2.15 | -7.53 | $2.58 \times 10^{-11}$ |
| SCNN1B     | -1.42 | -7.54 | $2.43 \times 10^{-11}$ |
| SORBS2     | -1.21 | -7.53 | $2.63 \times 10^{-11}$ |
| RCOR2      | 1.33  | 7.48  | $3.59 \times 10^{-11}$ |
| GPRC5C     | -1.07 | -7.50 | $3.06 \times 10^{-11}$ |
| DBF4P1     | 1.11  | 7.47  | $3.75 \times 10^{-11}$ |
| NALCN      | -1.02 | -7.45 | $4.27 \times 10^{-11}$ |
| LINC01775  | 1.17  | 7.44  | $4.64 \times 10^{-11}$ |
| LGI3       | -2.43 | -7.43 | $4.81 \times 10^{-11}$ |
| AL390961.3 | 1.07  | 7.42  | $4.93 \times 10^{-11}$ |
| AC112777.1 | 1.21  | 7.42  | $4.97 \times 10^{-11}$ |
| AC018647.1 | -1.05 | -7.42 | $5.01 \times 10^{-11}$ |
| WSCD2      | -1.28 | -7.42 | $5.16 \times 10^{-11}$ |
| LINC01352  | -1.10 | -7.42 | $5.16 \times 10^{-11}$ |
| GLI1       | -1.07 | -7.41 | $5.48 \times 10^{-11}$ |
| PGM5P4     | -1.51 | -7.40 | $5.75 \times 10^{-11}$ |



|            |       |       |                        |
|------------|-------|-------|------------------------|
| AC005165.1 | -1.64 | -7.39 | $6.12 \times 10^{-11}$ |
| FMO5       | -1.31 | -7.40 | $5.60 \times 10^{-11}$ |
| AC013275.1 | -1.92 | -7.38 | $6.62 \times 10^{-11}$ |
| HIST1H3B   | 1.64  | 7.38  | $6.48 \times 10^{-11}$ |
| ISLR2      | -1.09 | -7.37 | $6.78 \times 10^{-11}$ |
| AC005042.1 | 1.22  | 7.38  | $6.54 \times 10^{-11}$ |
| SFTA1P     | -1.81 | -7.37 | $6.64 \times 10^{-11}$ |
| AP003555.3 | -1.26 | -7.37 | $6.97 \times 10^{-11}$ |
| COL6A6     | -1.44 | -7.36 | $7.05 \times 10^{-11}$ |
| LINC01213  | 1.54  | 7.36  | $7.21 \times 10^{-11}$ |
| AC009041.1 | -1.26 | -7.36 | $7.32 \times 10^{-11}$ |
| CD207      | -2.17 | -7.35 | $7.46 \times 10^{-11}$ |
| CAPN8      | -1.60 | -7.39 | $6.20 \times 10^{-11}$ |
| CAVIN2     | -1.02 | -7.37 | $6.66 \times 10^{-11}$ |
| PRSS12     | -1.65 | -7.34 | $8.16 \times 10^{-11}$ |
| AL731557.1 | -1.24 | -7.33 | $8.74 \times 10^{-11}$ |
| HIST2H2AC  | 1.13  | 7.32  | $8.97 \times 10^{-11}$ |
| PNMA2      | -1.20 | -7.34 | $8.04 \times 10^{-11}$ |
| AC008878.3 | -1.27 | -7.32 | $9.03 \times 10^{-11}$ |
| RAC3       | 1.01  | 7.33  | $8.34 \times 10^{-11}$ |
| THSD7B     | -1.28 | -7.32 | $9.21 \times 10^{-11}$ |
| CD1C       | -1.37 | -7.32 | $9.16 \times 10^{-11}$ |
| ANKFN1     | -1.70 | -7.30 | $1.01 \times 10^{-10}$ |
| LSP1P2     | -1.15 | -7.30 | $1.02 \times 10^{-10}$ |
| ADCY2      | -1.39 | -7.30 | $1.05 \times 10^{-10}$ |
| CLEC3B     | -1.14 | -7.29 | $1.10 \times 10^{-10}$ |
| AL355388.1 | -1.63 | -7.28 | $1.15 \times 10^{-10}$ |
| CTSH       | -1.09 | -7.36 | $7.33 \times 10^{-11}$ |
| SCARA3     | -1.01 | -7.29 | $1.10 \times 10^{-10}$ |
| HSD17B6    | -1.38 | -7.28 | $1.15 \times 10^{-10}$ |
| RASGRF1    | -1.66 | -7.27 | $1.19 \times 10^{-10}$ |
| LRRC31     | -2.07 | -7.26 | $1.28 \times 10^{-10}$ |
| AC021945.1 | 1.14  | 7.26  | $1.30 \times 10^{-10}$ |
| CDCA7      | 1.09  | 7.26  | $1.25 \times 10^{-10}$ |
| PENK       | -1.81 | -7.24 | $1.46 \times 10^{-10}$ |
| DES        | -1.44 | -7.24 | $1.46 \times 10^{-10}$ |
| AFF2       | -1.31 | -7.23 | $1.55 \times 10^{-10}$ |
| TPPP       | -1.17 | -7.24 | $1.41 \times 10^{-10}$ |
| SHE        | -1.26 | -7.23 | $1.50 \times 10^{-10}$ |
| LINC01942  | -1.50 | -7.21 | $1.70 \times 10^{-10}$ |
| VIPR1      | -1.08 | -7.22 | $1.65 \times 10^{-10}$ |
| FOS        | -1.08 | -7.27 | $1.19 \times 10^{-10}$ |
| PTPN13     | -1.15 | -7.23 | $1.49 \times 10^{-10}$ |
| FAM180A    | -1.07 | -7.19 | $1.90 \times 10^{-10}$ |
| MMRN1      | -1.13 | -7.20 | $1.81 \times 10^{-10}$ |
| AC104035.1 | -1.27 | -7.19 | $1.90 \times 10^{-10}$ |
| TPSAB1     | -1.28 | -7.20 | $1.80 \times 10^{-10}$ |
| HHIP       | -2.12 | -7.19 | $1.90 \times 10^{-10}$ |
| CCR6       | -1.24 | -7.19 | $1.91 \times 10^{-10}$ |
| PLA2G10    | -1.69 | -7.17 | $2.09 \times 10^{-10}$ |
| EDA        | -1.18 | -7.17 | $2.09 \times 10^{-10}$ |
| ITGB6      | -1.07 | -7.23 | $1.57 \times 10^{-10}$ |
| HNFB1B     | -1.40 | -7.19 | $1.94 \times 10^{-10}$ |
| IRX1       | -2.27 | -7.16 | $2.23 \times 10^{-10}$ |
| CTSE       | -2.26 | -7.20 | $1.78 \times 10^{-10}$ |
| P3H2       | -1.38 | -7.17 | $2.09 \times 10^{-10}$ |
| OTC        | -1.38 | -7.15 | $2.37 \times 10^{-10}$ |
| AC137834.2 | 1.12  | 7.14  | $2.56 \times 10^{-10}$ |
| KCNA4      | -1.49 | -7.14 | $2.51 \times 10^{-10}$ |
| LINC02321  | 1.38  | 7.14  | $2.51 \times 10^{-10}$ |
| HIST1H2AJ  | 1.45  | 7.14  | $2.58 \times 10^{-10}$ |
| MAOA       | -1.10 | -7.18 | $2.00 \times 10^{-10}$ |
| ITGBL1     | -1.03 | -7.15 | $2.39 \times 10^{-10}$ |
| AC007787.2 | -1.19 | -7.13 | $2.75 \times 10^{-10}$ |
| C1QL4      | 1.52  | 7.13  | $2.72 \times 10^{-10}$ |
| OLFM1      | -1.21 | -7.13 | $2.66 \times 10^{-10}$ |
| PTPRT      | -2.17 | -7.12 | $2.86 \times 10^{-10}$ |
| ARTN       | 1.16  | 7.11  | $2.93 \times 10^{-10}$ |
| LEFTY2     | -1.53 | -7.11 | $3.04 \times 10^{-10}$ |

|             |       |       |                        |
|-------------|-------|-------|------------------------|
| GALNT16     | -1.14 | -7.11 | $3.06 \times 10^{-10}$ |
| WIF1        | -2.47 | -7.11 | $3.00 \times 10^{-10}$ |
| AL445423.1  | -1.05 | -7.11 | $3.02 \times 10^{-10}$ |
| MALL        | -1.12 | -7.12 | $2.78 \times 10^{-10}$ |
| MUSK        | -1.28 | -7.09 | $3.31 \times 10^{-10}$ |
| SHOX2       | 1.56  | 7.08  | $3.52 \times 10^{-10}$ |
| HABP2       | -2.11 | -7.09 | $3.44 \times 10^{-10}$ |
| CLU         | -1.29 | -7.15 | $2.39 \times 10^{-10}$ |
| MYOC        | -1.46 | -7.08 | $3.61 \times 10^{-10}$ |
| MUC1        | -1.07 | -7.18 | $2.02 \times 10^{-10}$ |
| DUSP27      | -1.50 | -7.07 | $3.79 \times 10^{-10}$ |
| CHIA        | -2.25 | -7.07 | $3.85 \times 10^{-10}$ |
| ERVFRD-1    | -1.08 | -7.06 | $3.93 \times 10^{-10}$ |
| PTCSC3      | -1.78 | -7.05 | $4.16 \times 10^{-10}$ |
| AL133466.1  | -1.47 | -7.05 | $4.17 \times 10^{-10}$ |
| VILL        | -1.17 | -7.07 | $3.79 \times 10^{-10}$ |
| FDPSP8      | 1.08  | 7.05  | $4.21 \times 10^{-10}$ |
| AP003385.4  | -1.33 | -7.05 | $4.24 \times 10^{-10}$ |
| MT1H        | 1.61  | 7.05  | $4.30 \times 10^{-10}$ |
| ATP13A4-AS1 | -1.88 | -7.05 | $4.23 \times 10^{-10}$ |
| DAAM2       | -1.04 | -7.07 | $3.85 \times 10^{-10}$ |
| ATP5MC1P4   | 1.01  | 7.04  | $4.41 \times 10^{-10}$ |
| HR          | -1.20 | -7.04 | $4.50 \times 10^{-10}$ |
| CEACAM8     | -1.81 | -7.04 | $4.43 \times 10^{-10}$ |
| ACKR1       | -1.53 | -7.05 | $4.26 \times 10^{-10}$ |
| AC009093.3  | -1.54 | -7.04 | $4.51 \times 10^{-10}$ |
| GUCA1A      | 1.49  | 7.03  | $4.66 \times 10^{-10}$ |
| CHIAP2      | -2.32 | -7.03 | $4.72 \times 10^{-10}$ |
| AC104260.2  | -1.12 | -7.03 | $4.71 \times 10^{-10}$ |
| AL162511.1  | -1.75 | -7.02 | $5.12 \times 10^{-10}$ |
| LINC01645   | -1.21 | -7.02 | $5.11 \times 10^{-10}$ |
| AC046195.1  | -2.08 | -7.02 | $5.12 \times 10^{-10}$ |
| MIR27A      | -1.08 | -7.01 | $5.32 \times 10^{-10}$ |
| CAPN3       | -1.02 | -7.01 | $5.35 \times 10^{-10}$ |
| RAB44       | -1.05 | -7.01 | $5.35 \times 10^{-10}$ |
| FSD1        | 1.21  | 7.00  | $5.47 \times 10^{-10}$ |
| LPL         | -1.40 | -7.03 | $4.69 \times 10^{-10}$ |
| DRD1        | -1.75 | -7.00 | $5.71 \times 10^{-10}$ |
| SLC16A11    | -1.09 | -6.99 | $6.06 \times 10^{-10}$ |
| C3          | -1.16 | -7.09 | $3.36 \times 10^{-10}$ |
| SYNDIG1L    | -1.46 | -6.98 | $6.25 \times 10^{-10}$ |
| CADM3-AS1   | -1.36 | -6.98 | $6.28 \times 10^{-10}$ |
| EDN3        | -1.74 | -6.97 | $6.45 \times 10^{-10}$ |
| CCL26       | 1.42  | 6.97  | $6.48 \times 10^{-10}$ |
| CPO         | -1.12 | -6.97 | $6.44 \times 10^{-10}$ |
| LINC01750   | -1.17 | -6.97 | $6.48 \times 10^{-10}$ |
| ADAMTS9-AS2 | -1.04 | -6.97 | $6.66 \times 10^{-10}$ |
| RTN4RL1     | -1.47 | -6.97 | $6.71 \times 10^{-10}$ |
| HS3ST2      | -1.19 | -6.97 | $6.58 \times 10^{-10}$ |
| LUZP2       | -1.80 | -6.96 | $6.86 \times 10^{-10}$ |
| SIGLEC17P   | -1.10 | -6.95 | $7.23 \times 10^{-10}$ |
| CPB2        | -2.28 | -6.95 | $7.28 \times 10^{-10}$ |
| AC007207.2  | -1.94 | -6.95 | $7.28 \times 10^{-10}$ |
| AC060834.1  | -1.52 | -6.95 | $7.20 \times 10^{-10}$ |
| SEPT14P12   | 1.17  | 6.94  | $7.55 \times 10^{-10}$ |
| F11-AS1     | -1.59 | -6.95 | $7.40 \times 10^{-10}$ |
| AGER        | -1.62 | -6.97 | $6.52 \times 10^{-10}$ |
| MIR3189     | -1.64 | -6.94 | $7.69 \times 10^{-10}$ |
| RN7SKP51    | -1.48 | -6.93 | $8.09 \times 10^{-10}$ |
| AC004947.2  | -1.18 | -6.93 | $8.20 \times 10^{-10}$ |
| SFTPC       | -3.59 | -6.96 | $6.82 \times 10^{-10}$ |
| WNT11       | -1.16 | -6.91 | $9.33 \times 10^{-10}$ |
| IL33        | -1.04 | -6.93 | $8.20 \times 10^{-10}$ |
| INMT-MINDY4 | -1.28 | -6.90 | $9.51 \times 10^{-10}$ |
| PGBD4P3     | -1.06 | -6.89 | $1.02 \times 10^{-09}$ |
| AC093503.3  | -1.03 | -6.89 | $1.03 \times 10^{-09}$ |
| GFI1B       | -1.14 | -6.89 | $1.04 \times 10^{-09}$ |
| RYR2        | -1.04 | -6.88 | $1.07 \times 10^{-09}$ |
| AC016877.3  | 1.41  | 6.88  | $1.09 \times 10^{-09}$ |

|              |       |       |                        |
|--------------|-------|-------|------------------------|
| DNASE2B      | -1.42 | -6.87 | $1.14 \times 10^{-09}$ |
| FLRT3        | -1.26 | -6.90 | $9.57 \times 10^{-10}$ |
| LINC02195    | 1.34  | 6.87  | $1.15 \times 10^{-09}$ |
| SLC18A2      | -1.23 | -6.86 | $1.19 \times 10^{-09}$ |
| ACOD1        | 1.44  | 6.87  | $1.18 \times 10^{-09}$ |
| KCNS2        | -1.10 | -6.86 | $1.19 \times 10^{-09}$ |
| LRRC36       | -1.31 | -6.86 | $1.20 \times 10^{-09}$ |
| ADRB3        | -1.40 | -6.86 | $1.21 \times 10^{-09}$ |
| C3orf86      | -1.26 | -6.85 | $1.28 \times 10^{-09}$ |
| GFRA2        | -1.00 | -6.84 | $1.37 \times 10^{-09}$ |
| ACSM1        | -1.04 | -6.82 | $1.49 \times 10^{-09}$ |
| FOXI2        | -1.38 | -6.82 | $1.52 \times 10^{-09}$ |
| TNNI3K       | -1.12 | -6.81 | $1.57 \times 10^{-09}$ |
| F13A1        | -1.16 | -6.84 | $1.36 \times 10^{-09}$ |
| AC006329.1   | 1.23  | 6.80  | $1.71 \times 10^{-09}$ |
| MIR1-1HG-AS1 | -1.18 | -6.80 | $1.73 \times 10^{-09}$ |
| ACSM5        | -1.19 | -6.79 | $1.77 \times 10^{-09}$ |
| AC092071.1   | -1.78 | -6.79 | $1.78 \times 10^{-09}$ |
| LINC00469    | -1.19 | -6.79 | $1.79 \times 10^{-09}$ |
| ELANE        | -1.58 | -6.79 | $1.80 \times 10^{-09}$ |
| MC5R         | -1.27 | -6.79 | $1.81 \times 10^{-09}$ |
| CYP4X1       | -1.29 | -6.80 | $1.68 \times 10^{-09}$ |
| HLX-AS1      | -1.04 | -6.78 | $1.95 \times 10^{-09}$ |
| AC010271.2   | 1.08  | 6.77  | $1.98 \times 10^{-09}$ |
| AL160153.1   | -1.06 | -6.77 | $2.00 \times 10^{-09}$ |
| MAST1        | 1.02  | 6.77  | $2.07 \times 10^{-09}$ |
| ALPL         | -1.53 | -6.80 | $1.67 \times 10^{-09}$ |
| PTGDS        | -1.08 | -6.80 | $1.72 \times 10^{-09}$ |
| HCN4         | -1.75 | -6.75 | $2.33 \times 10^{-09}$ |
| AC004947.1   | -1.33 | -6.74 | $2.44 \times 10^{-09}$ |
| RORB         | -1.51 | -6.73 | $2.59 \times 10^{-09}$ |
| SCGB3A1      | -2.52 | -6.76 | $2.19 \times 10^{-09}$ |
| RNASE1       | -1.08 | -6.82 | $1.55 \times 10^{-09}$ |
| GPR12        | -1.78 | -6.72 | $2.72 \times 10^{-09}$ |
| BCHE         | -1.10 | -6.72 | $2.71 \times 10^{-09}$ |
| DEPDC1-AS1   | 1.13  | 6.71  | $2.82 \times 10^{-09}$ |
| AL590226.1   | -1.02 | -6.71 | $2.84 \times 10^{-09}$ |
| CNR1         | -1.23 | -6.71 | $2.79 \times 10^{-09}$ |
| PCDH15       | -1.64 | -6.70 | $2.93 \times 10^{-09}$ |
| AC016769.1   | 1.39  | 6.70  | $3.01 \times 10^{-09}$ |
| RGS22        | -1.28 | -6.69 | $3.12 \times 10^{-09}$ |
| HPGD         | -1.56 | -6.73 | $2.47 \times 10^{-09}$ |
| AC012085.2   | -1.16 | -6.69 | $3.16 \times 10^{-09}$ |
| NWD1         | -1.86 | -6.69 | $3.16 \times 10^{-09}$ |
| SOSTDC1      | -1.99 | -6.68 | $3.30 \times 10^{-09}$ |
| GKN2         | -2.59 | -6.67 | $3.47 \times 10^{-09}$ |
| SLC17A3      | -1.28 | -6.67 | $3.49 \times 10^{-09}$ |
| LCN6         | -1.25 | -6.67 | $3.50 \times 10^{-09}$ |
| AC145124.1   | -1.01 | -6.67 | $3.58 \times 10^{-09}$ |
| C6           | -1.88 | -6.66 | $3.81 \times 10^{-09}$ |
| ZBTB7C       | -1.19 | -6.67 | $3.51 \times 10^{-09}$ |
| AL355870.1   | -1.13 | -6.65 | $3.96 \times 10^{-09}$ |
| ENTPD3       | -1.06 | -6.66 | $3.81 \times 10^{-09}$ |
| SBSN         | 2.02  | 6.62  | $4.66 \times 10^{-09}$ |
| C10orf105    | -1.07 | -6.62 | $4.77 \times 10^{-09}$ |
| AQP4         | -2.18 | -6.65 | $4.02 \times 10^{-09}$ |
| PIGR         | -2.21 | -6.69 | $3.12 \times 10^{-09}$ |
| AL031058.1   | 1.10  | 6.61  | $5.04 \times 10^{-09}$ |
| KCNK3        | -1.25 | -6.62 | $4.74 \times 10^{-09}$ |
| CHI3L2       | -1.25 | -6.61 | $4.91 \times 10^{-09}$ |
| TMEM232      | -1.24 | -6.59 | $5.51 \times 10^{-09}$ |
| TMEM100      | -1.36 | -6.60 | $5.27 \times 10^{-09}$ |
| CDH20        | -1.60 | -6.59 | $5.55 \times 10^{-09}$ |
| AC084759.3   | -1.57 | -6.58 | $5.69 \times 10^{-09}$ |
| FAM216B      | -2.03 | -6.58 | $5.82 \times 10^{-09}$ |
| AP003721.1   | 1.09  | 6.57  | $6.08 \times 10^{-09}$ |
| GGT6         | -1.85 | -6.58 | $5.66 \times 10^{-09}$ |
| CYP4F24P     | -1.37 | -6.57 | $6.10 \times 10^{-09}$ |
| TSLP         | -1.11 | -6.57 | $6.15 \times 10^{-09}$ |

|               |       |       |                        |
|---------------|-------|-------|------------------------|
| AL157895.1    | -1.04 | -6.56 | $6.30 \times 10^{-09}$ |
| MUCL3         | -1.96 | -6.57 | $6.20 \times 10^{-09}$ |
| SFTA2         | -1.46 | -6.62 | $4.70 \times 10^{-09}$ |
| ADGRG2        | -1.07 | -6.56 | $6.39 \times 10^{-09}$ |
| B3GNT8        | -1.04 | -6.58 | $5.78 \times 10^{-09}$ |
| PLA2G4F       | -1.31 | -6.57 | $6.10 \times 10^{-09}$ |
| AC112907.2    | 1.11  | 6.54  | $6.97 \times 10^{-09}$ |
| AL445493.3    | -1.25 | -6.54 | $7.14 \times 10^{-09}$ |
| HSD17B13      | -1.34 | -6.54 | $7.29 \times 10^{-09}$ |
| ENAM          | -1.52 | -6.53 | $7.47 \times 10^{-09}$ |
| GATA1         | -1.01 | -6.53 | $7.49 \times 10^{-09}$ |
| AC079630.1    | -1.63 | -6.53 | $7.46 \times 10^{-09}$ |
| ABO           | -1.25 | -6.56 | $6.34 \times 10^{-09}$ |
| CCDC141       | -1.07 | -6.52 | $7.90 \times 10^{-09}$ |
| CERNA3        | 1.00  | 6.52  | $7.85 \times 10^{-09}$ |
| TRHDE         | -1.62 | -6.52 | $7.97 \times 10^{-09}$ |
| NPNT          | -1.03 | -6.57 | $6.15 \times 10^{-09}$ |
| TPSB2         | -1.30 | -6.54 | $7.27 \times 10^{-09}$ |
| SOX6          | -1.06 | -6.52 | $8.14 \times 10^{-09}$ |
| AL109659.2    | -1.07 | -6.51 | $8.54 \times 10^{-09}$ |
| AC090044.1    | -1.08 | -6.50 | $8.87 \times 10^{-09}$ |
| LINC00551     | -1.25 | -6.48 | $9.73 \times 10^{-09}$ |
| STRIP2        | 1.16  | 6.49  | $9.34 \times 10^{-09}$ |
| ARL9          | 1.13  | 6.47  | $1.05 \times 10^{-08}$ |
| CDKL2         | -1.14 | -6.48 | $9.75 \times 10^{-09}$ |
| GPM6A         | -1.52 | -6.46 | $1.11 \times 10^{-08}$ |
| DYNLRB2       | -1.43 | -6.42 | $1.34 \times 10^{-08}$ |
| SERPINB10     | -1.24 | -6.42 | $1.36 \times 10^{-08}$ |
| GZMB          | 1.12  | 6.44  | $1.23 \times 10^{-08}$ |
| MYH2          | -1.20 | -6.42 | $1.38 \times 10^{-08}$ |
| SLC14A1       | -1.03 | -6.41 | $1.43 \times 10^{-08}$ |
| AC010998.3    | -1.62 | -6.40 | $1.55 \times 10^{-08}$ |
| SCUBE2        | -1.27 | -6.42 | $1.34 \times 10^{-08}$ |
| GAS6-AS1      | -1.07 | -6.40 | $1.51 \times 10^{-08}$ |
| BMX           | -1.04 | -6.38 | $1.72 \times 10^{-08}$ |
| CMA1          | -1.20 | -6.37 | $1.76 \times 10^{-08}$ |
| MYMK          | -1.07 | -6.38 | $1.70 \times 10^{-08}$ |
| AC099518.1    | 1.09  | 6.37  | $1.78 \times 10^{-08}$ |
| AF279873.1    | 1.05  | 6.37  | $1.78 \times 10^{-08}$ |
| CFTR          | -1.59 | -6.39 | $1.59 \times 10^{-08}$ |
| AC106738.2    | -1.45 | -6.37 | $1.81 \times 10^{-08}$ |
| CD36          | -1.03 | -6.40 | $1.55 \times 10^{-08}$ |
| IYD           | -1.72 | -6.36 | $1.83 \times 10^{-08}$ |
| AP003064.2    | -1.21 | -6.35 | $2.00 \times 10^{-08}$ |
| DNAH6         | -1.21 | -6.35 | $2.03 \times 10^{-08}$ |
| LINC01305     | 1.41  | 6.34  | $2.13 \times 10^{-08}$ |
| MC2R          | -1.17 | -6.34 | $2.04 \times 10^{-08}$ |
| ANO5          | -1.25 | -6.34 | $2.07 \times 10^{-08}$ |
| RSPO4         | -1.34 | -6.33 | $2.15 \times 10^{-08}$ |
| ZYG11A        | 1.53  | 6.33  | $2.14 \times 10^{-08}$ |
| SIGLEC6       | -1.10 | -6.33 | $2.22 \times 10^{-08}$ |
| GLP1R         | -1.49 | -6.32 | $2.27 \times 10^{-08}$ |
| COCH          | 1.43  | 6.33  | $2.16 \times 10^{-08}$ |
| AC133963.1    | -1.66 | -6.32 | $2.33 \times 10^{-08}$ |
| PCSK2         | -2.96 | -6.31 | $2.37 \times 10^{-08}$ |
| SDK2          | -1.10 | -6.32 | $2.25 \times 10^{-08}$ |
| ZNF670-ZNF695 | 1.03  | 6.31  | $2.46 \times 10^{-08}$ |
| TYRP1         | -1.24 | -6.31 | $2.47 \times 10^{-08}$ |
| CA3           | -1.14 | -6.30 | $2.58 \times 10^{-08}$ |
| MAB21L1       | -1.01 | -6.29 | $2.69 \times 10^{-08}$ |
| PLPPR1        | -1.73 | -6.30 | $2.62 \times 10^{-08}$ |
| ADGRB3        | -1.11 | -6.27 | $2.93 \times 10^{-08}$ |
| AP000526.1    | 1.17  | 6.27  | $3.01 \times 10^{-08}$ |
| LINC00163     | -1.15 | -6.26 | $3.13 \times 10^{-08}$ |
| ZNF536        | -1.22 | -6.26 | $3.20 \times 10^{-08}$ |
| AL035665.1    | -1.12 | -6.26 | $3.24 \times 10^{-08}$ |
| FAM189A2      | -1.05 | -6.28 | $2.86 \times 10^{-08}$ |
| AC027627.1    | 1.12  | 6.27  | $3.06 \times 10^{-08}$ |
| AC007671.1    | -1.05 | -6.25 | $3.33 \times 10^{-08}$ |

|             |       |       |                        |
|-------------|-------|-------|------------------------|
| GLDC        | 1.35  | 6.26  | $3.22 \times 10^{-08}$ |
| SILC1       | -1.70 | -6.24 | $3.43 \times 10^{-08}$ |
| TRIM71      | -1.70 | -6.24 | $3.51 \times 10^{-08}$ |
| IFNG        | 1.38  | 6.24  | $3.59 \times 10^{-08}$ |
| KLF15       | -1.11 | -6.25 | $3.28 \times 10^{-08}$ |
| GCSAML      | -1.18 | -6.23 | $3.65 \times 10^{-08}$ |
| SCGB1A1     | -2.96 | -6.26 | $3.20 \times 10^{-08}$ |
| DNAH9       | -2.02 | -6.23 | $3.63 \times 10^{-08}$ |
| DLEC1       | -1.16 | -6.23 | $3.73 \times 10^{-08}$ |
| CHRM1       | -1.36 | -6.21 | $3.99 \times 10^{-08}$ |
| C5orf38     | -1.53 | -6.23 | $3.74 \times 10^{-08}$ |
| AL355974.2  | -1.10 | -6.21 | $4.11 \times 10^{-08}$ |
| AC044810.2  | -1.19 | -6.21 | $4.17 \times 10^{-08}$ |
| TNN         | -1.03 | -6.20 | $4.25 \times 10^{-08}$ |
| TPPP3       | -1.14 | -6.25 | $3.34 \times 10^{-08}$ |
| SHISA6      | -1.37 | -6.20 | $4.36 \times 10^{-08}$ |
| PGC         | -3.11 | -6.24 | $3.45 \times 10^{-08}$ |
| XCR1        | -1.02 | -6.20 | $4.39 \times 10^{-08}$ |
| LDLRAD4-AS1 | -1.00 | -6.18 | $4.79 \times 10^{-08}$ |
| GGTLC5P     | -1.06 | -6.19 | $4.45 \times 10^{-08}$ |
| SLC34A2     | -1.36 | -6.32 | $2.35 \times 10^{-08}$ |
| NEXMIF      | -1.48 | -6.16 | $5.30 \times 10^{-08}$ |
| CADPS       | -1.19 | -6.15 | $5.47 \times 10^{-08}$ |
| LINC01996   | -1.35 | -6.15 | $5.55 \times 10^{-08}$ |
| C10orf142   | -1.17 | -6.15 | $5.56 \times 10^{-08}$ |
| COL20A1     | 1.16  | 6.14  | $5.78 \times 10^{-08}$ |
| AC018742.1  | -1.27 | -6.15 | $5.70 \times 10^{-08}$ |
| NXF3        | -1.30 | -6.14 | $6.00 \times 10^{-08}$ |
| LINC01844   | -1.30 | -6.13 | $6.02 \times 10^{-08}$ |
| AL109615.3  | 1.12  | 6.14  | $5.92 \times 10^{-08}$ |
| TCEAL2      | -1.25 | -6.13 | $6.28 \times 10^{-08}$ |
| ANKRD18B    | 1.70  | 6.13  | $6.28 \times 10^{-08}$ |
| ACOXL       | -1.13 | -6.14 | $5.90 \times 10^{-08}$ |
| PTPRQ       | -1.40 | -6.12 | $6.36 \times 10^{-08}$ |
| LRRC52-AS1  | -1.73 | -6.12 | $6.51 \times 10^{-08}$ |
| PRSS35      | -1.03 | -6.11 | $6.75 \times 10^{-08}$ |
| TMEM130     | -1.36 | -6.13 | $6.23 \times 10^{-08}$ |
| MASPI       | -1.01 | -6.11 | $6.90 \times 10^{-08}$ |
| AL008733.1  | -1.47 | -6.10 | $7.22 \times 10^{-08}$ |
| HIST1H2BO   | 1.27  | 6.10  | $7.25 \times 10^{-08}$ |
| SFTPA2      | -2.29 | -6.24 | $3.58 \times 10^{-08}$ |
| COL6A5      | -1.23 | -6.11 | $6.90 \times 10^{-08}$ |
| AC016705.2  | -1.41 | -6.10 | $7.27 \times 10^{-08}$ |
| AC006994.2  | -1.06 | -6.10 | $7.24 \times 10^{-08}$ |
| AL136452.1  | -1.38 | -6.09 | $7.71 \times 10^{-08}$ |
| C4A         | -1.07 | -6.12 | $6.44 \times 10^{-08}$ |
| ZNF385B     | -1.55 | -6.10 | $7.05 \times 10^{-08}$ |
| GATA6-AS1   | -1.22 | -6.08 | $7.88 \times 10^{-08}$ |
| ANGPTL5     | -1.06 | -6.08 | $7.99 \times 10^{-08}$ |
| SERPINA1    | -1.23 | -6.21 | $4.06 \times 10^{-08}$ |
| SCARA5      | -1.54 | -6.08 | $7.78 \times 10^{-08}$ |
| NRAP        | -1.35 | -6.07 | $8.36 \times 10^{-08}$ |
| AC011944.1  | -1.22 | -6.07 | $8.40 \times 10^{-08}$ |
| AL137026.1  | -1.26 | -6.07 | $8.49 \times 10^{-08}$ |
| ADGRF5P1    | -1.10 | -6.06 | $8.67 \times 10^{-08}$ |
| AC018697.1  | -1.11 | -6.07 | $8.31 \times 10^{-08}$ |
| GDF15       | -1.14 | -6.13 | $6.16 \times 10^{-08}$ |
| KIF6        | -1.08 | -6.07 | $8.55 \times 10^{-08}$ |
| KCNJ5       | -1.02 | -6.08 | $7.87 \times 10^{-08}$ |
| ARC         | -1.08 | -6.06 | $8.77 \times 10^{-08}$ |
| SGCG        | -1.00 | -6.05 | $9.12 \times 10^{-08}$ |
| CLDN2       | -2.22 | -6.07 | $8.16 \times 10^{-08}$ |
| LINC02100   | 1.04  | 6.05  | $9.16 \times 10^{-08}$ |
| ANKRD7      | 1.24  | 6.05  | $9.32 \times 10^{-08}$ |
| CD1B        | -1.35 | -6.05 | $9.30 \times 10^{-08}$ |
| SNTN        | -1.70 | -6.05 | $9.16 \times 10^{-08}$ |
| PRMT8       | -1.79 | -6.04 | $9.78 \times 10^{-08}$ |
| ENPP7P11    | -1.17 | -6.03 | $1.00 \times 10^{-07}$ |
| TSPAN7      | -1.11 | -6.07 | $8.51 \times 10^{-08}$ |

|            |       |       |                        |
|------------|-------|-------|------------------------|
| ST8SIA6    | -1.06 | -6.03 | $1.03 \times 10^{-07}$ |
| GALNT5     | -1.00 | -6.07 | $8.37 \times 10^{-08}$ |
| AC093772.1 | -1.10 | -6.02 | $1.09 \times 10^{-07}$ |
| AGTR2      | -2.25 | -6.02 | $1.10 \times 10^{-07}$ |
| NSG1       | -1.12 | -6.00 | $1.18 \times 10^{-07}$ |
| MALRD1     | -1.25 | -5.99 | $1.23 \times 10^{-07}$ |
| AC068228.1 | 1.14  | 5.99  | $1.27 \times 10^{-07}$ |
| NME5       | -1.01 | -6.00 | $1.20 \times 10^{-07}$ |
| AGBL1      | -1.11 | -6.00 | $1.20 \times 10^{-07}$ |
| AQP1       | -1.22 | -6.09 | $7.58 \times 10^{-08}$ |
| IRX2       | -1.67 | -6.02 | $1.08 \times 10^{-07}$ |
| CFAP58     | -1.02 | -5.98 | $1.32 \times 10^{-07}$ |
| AC108156.1 | -1.08 | -5.98 | $1.28 \times 10^{-07}$ |
| IGSF9B     | -1.24 | -5.99 | $1.28 \times 10^{-07}$ |
| CABCOCO1   | -1.35 | -5.98 | $1.33 \times 10^{-07}$ |
| GAL        | 1.78  | 5.97  | $1.36 \times 10^{-07}$ |
| RGS7BP     | -1.20 | -5.97 | $1.38 \times 10^{-07}$ |
| UBXN10     | -1.03 | -6.01 | $1.12 \times 10^{-07}$ |
| FCGBP      | -1.37 | -6.03 | $1.03 \times 10^{-07}$ |
| TM4SF4     | -2.46 | -5.97 | $1.42 \times 10^{-07}$ |
| RIC3       | -1.16 | -5.96 | $1.44 \times 10^{-07}$ |
| CD1A       | -1.72 | -5.96 | $1.43 \times 10^{-07}$ |
| LINC01612  | -1.69 | -5.94 | $1.58 \times 10^{-07}$ |
| AC131009.2 | 1.27  | 5.94  | $1.57 \times 10^{-07}$ |
| KNDC1      | -1.40 | -5.96 | $1.43 \times 10^{-07}$ |
| KIR2DL4    | 1.39  | 5.93  | $1.66 \times 10^{-07}$ |
| CNTFR      | -1.37 | -5.93 | $1.69 \times 10^{-07}$ |
| SFTPA1     | -2.33 | -6.06 | $8.60 \times 10^{-08}$ |
| RGS20      | 1.24  | 5.93  | $1.68 \times 10^{-07}$ |
| FO681492.1 | -1.09 | -5.93 | $1.72 \times 10^{-07}$ |
| C15orf48   | 1.17  | 5.98  | $1.29 \times 10^{-07}$ |
| SEC14L3    | -1.53 | -5.91 | $1.86 \times 10^{-07}$ |
| GNG4       | 1.64  | 5.92  | $1.73 \times 10^{-07}$ |
| LINC00355  | 1.87  | 5.90  | $1.97 \times 10^{-07}$ |
| KCNJ15     | -1.27 | -5.95 | $1.49 \times 10^{-07}$ |
| P2RY12     | -1.08 | -5.89 | $2.01 \times 10^{-07}$ |
| C14orf180  | -1.15 | -5.89 | $2.02 \times 10^{-07}$ |
| HMGCLL1    | -1.00 | -5.89 | $2.06 \times 10^{-07}$ |
| ANKRD34C   | -1.06 | -5.94 | $1.63 \times 10^{-07}$ |
| PCDH11X    | -1.10 | -5.88 | $2.11 \times 10^{-07}$ |
| OCA2       | -1.46 | -5.88 | $2.17 \times 10^{-07}$ |
| ELN-AS1    | -1.02 | -5.88 | $2.13 \times 10^{-07}$ |
| C5orf49    | -1.25 | -5.89 | $2.06 \times 10^{-07}$ |
| HIST1H2BG  | 1.49  | 5.88  | $2.20 \times 10^{-07}$ |
| GRIN2A     | -1.78 | -5.87 | $2.30 \times 10^{-07}$ |
| VIPR1-AS1  | -1.02 | -5.87 | $2.30 \times 10^{-07}$ |
| OR51E1     | 1.25  | 5.86  | $2.38 \times 10^{-07}$ |
| GPC3       | -1.06 | -5.89 | $2.02 \times 10^{-07}$ |
| PIFO       | -1.03 | -5.88 | $2.17 \times 10^{-07}$ |
| MRC1       | -1.02 | -5.92 | $1.81 \times 10^{-07}$ |
| AL354861.3 | -1.08 | -5.86 | $2.36 \times 10^{-07}$ |
| APOD       | -1.34 | -5.89 | $2.01 \times 10^{-07}$ |
| HIST1H2AE  | 1.49  | 5.84  | $2.65 \times 10^{-07}$ |
| CLIC5      | -1.11 | -5.88 | $2.11 \times 10^{-07}$ |
| CLEC9A     | -1.01 | -5.83 | $2.70 \times 10^{-07}$ |
| MIR137HG   | 1.47  | 5.83  | $2.72 \times 10^{-07}$ |
| LINC02471  | -1.69 | -5.83 | $2.74 \times 10^{-07}$ |
| AQP3       | -1.20 | -5.96 | $1.48 \times 10^{-07}$ |
| AC091173.1 | 1.36  | 5.83  | $2.74 \times 10^{-07}$ |
| PPP1R1B    | -1.65 | -5.87 | $2.23 \times 10^{-07}$ |
| LINC01214  | 1.56  | 5.81  | $3.04 \times 10^{-07}$ |
| C1orf87    | -1.85 | -5.81 | $3.04 \times 10^{-07}$ |
| LINC02657  | 1.39  | 5.81  | $3.06 \times 10^{-07}$ |
| GPD1       | -1.09 | -5.82 | $2.84 \times 10^{-07}$ |
| LINC02587  | -1.03 | -5.80 | $3.17 \times 10^{-07}$ |
| TERT       | 1.23  | 5.80  | $3.13 \times 10^{-07}$ |
| OR5BA1P    | -1.04 | -5.80 | $3.21 \times 10^{-07}$ |
| LGR6       | -1.18 | -5.82 | $2.94 \times 10^{-07}$ |
| CXCL10     | 1.12  | 5.85  | $2.43 \times 10^{-07}$ |

|            |       |       |                        |
|------------|-------|-------|------------------------|
| LINC01625  | -1.01 | -5.80 | $3.16 \times 10^{-07}$ |
| IGF2BP3    | 1.58  | 5.81  | $2.95 \times 10^{-07}$ |
| DACH2      | -1.25 | -5.79 | $3.38 \times 10^{-07}$ |
| AQP7       | -1.33 | -5.80 | $3.19 \times 10^{-07}$ |
| CYP2A6     | -1.45 | -5.78 | $3.45 \times 10^{-07}$ |
| CEACAM6    | -1.36 | -5.95 | $1.54 \times 10^{-07}$ |
| CDIPTOSP   | 1.26  | 5.78  | $3.52 \times 10^{-07}$ |
| HIST1H1B   | 1.38  | 5.77  | $3.63 \times 10^{-07}$ |
| ANO4       | -1.23 | -5.77 | $3.65 \times 10^{-07}$ |
| COL21A1    | -1.04 | -5.80 | $3.18 \times 10^{-07}$ |
| HIST1H2BJ  | 1.04  | 5.77  | $3.60 \times 10^{-07}$ |
| AC089983.1 | 1.41  | 5.76  | $3.80 \times 10^{-07}$ |
| OVCH2      | -1.28 | -5.75 | $4.01 \times 10^{-07}$ |
| IHH        | -1.53 | -5.75 | $4.13 \times 10^{-07}$ |
| PCARE      | -1.40 | -5.74 | $4.16 \times 10^{-07}$ |
| TRPV6      | -1.42 | -5.75 | $4.13 \times 10^{-07}$ |
| SHISA3     | -1.80 | -5.75 | $4.12 \times 10^{-07}$ |
| NRG3       | -1.11 | -5.72 | $4.61 \times 10^{-07}$ |
| AC073862.5 | -1.17 | -5.72 | $4.66 \times 10^{-07}$ |
| NPY5R      | -1.07 | -5.73 | $4.43 \times 10^{-07}$ |
| MIR4697HG  | -1.29 | -5.74 | $4.35 \times 10^{-07}$ |
| CYP4Z1     | -1.22 | -5.71 | $4.90 \times 10^{-07}$ |
| UGT2B15    | -1.93 | -5.71 | $4.91 \times 10^{-07}$ |
| HIST1H3F   | 1.25  | 5.72  | $4.78 \times 10^{-07}$ |
| AC122710.2 | 1.02  | 5.71  | $4.97 \times 10^{-07}$ |
| VGF        | 1.47  | 5.71  | $4.90 \times 10^{-07}$ |
| SLC22A31   | -1.33 | -5.79 | $3.36 \times 10^{-07}$ |
| HIST2H2AB  | 1.13  | 5.70  | $5.10 \times 10^{-07}$ |
| AP004608.1 | -1.97 | -5.71 | $4.83 \times 10^{-07}$ |
| CYP4F12    | -1.36 | -5.70 | $5.14 \times 10^{-07}$ |
| FAM81B     | -1.34 | -5.71 | $5.01 \times 10^{-07}$ |
| AC020928.2 | 1.29  | 5.69  | $5.37 \times 10^{-07}$ |
| AC013264.1 | -1.33 | -5.69 | $5.53 \times 10^{-07}$ |
| MASIL      | -1.08 | -5.70 | $5.12 \times 10^{-07}$ |
| KCNG3      | 1.23  | 5.68  | $5.57 \times 10^{-07}$ |
| RPS29P11   | -1.24 | -5.68 | $5.63 \times 10^{-07}$ |
| ITIH2      | -1.60 | -5.68 | $5.63 \times 10^{-07}$ |
| BAAT       | -1.57 | -5.68 | $5.59 \times 10^{-07}$ |
| KLC3       | 1.06  | 5.70  | $5.20 \times 10^{-07}$ |
| ARSEP1     | -1.51 | -5.67 | $5.93 \times 10^{-07}$ |
| CFAP57     | -1.10 | -5.69 | $5.45 \times 10^{-07}$ |
| AC016205.1 | 1.18  | 5.67  | $5.85 \times 10^{-07}$ |
| PDZRN4     | -1.15 | -5.67 | $5.97 \times 10^{-07}$ |
| CDH19      | -1.31 | -5.67 | $6.04 \times 10^{-07}$ |
| HOPX       | -1.19 | -5.78 | $3.56 \times 10^{-07}$ |
| CNTN3      | -1.21 | -5.66 | $6.18 \times 10^{-07}$ |
| KIF12      | -1.31 | -5.68 | $5.63 \times 10^{-07}$ |
| AC105254.2 | -1.22 | -5.65 | $6.57 \times 10^{-07}$ |
| CAPN6      | -1.78 | -5.65 | $6.51 \times 10^{-07}$ |
| LINC01550  | -1.03 | -5.65 | $6.54 \times 10^{-07}$ |
| PCMTD1P3   | 1.16  | 5.64  | $6.93 \times 10^{-07}$ |
| LINC00443  | -1.08 | -5.65 | $6.67 \times 10^{-07}$ |
| KIAA0408   | -1.15 | -5.63 | $7.07 \times 10^{-07}$ |
| CBLN4      | -1.13 | -5.63 | $7.08 \times 10^{-07}$ |
| DMBT1      | -2.02 | -5.68 | $5.77 \times 10^{-07}$ |
| ODAM       | -1.36 | -5.60 | $8.42 \times 10^{-07}$ |
| AC108215.1 | -1.30 | -5.60 | $8.11 \times 10^{-07}$ |
| RAB3C      | -1.12 | -5.59 | $8.71 \times 10^{-07}$ |
| AC129507.3 | -1.12 | -5.58 | $8.94 \times 10^{-07}$ |
| IL5RA      | -1.15 | -5.59 | $8.71 \times 10^{-07}$ |
| AC115099.1 | -1.14 | -5.58 | $9.07 \times 10^{-07}$ |
| AC008268.1 | -2.05 | -5.58 | $8.96 \times 10^{-07}$ |
| FP325330.3 | 1.22  | 5.59  | $8.67 \times 10^{-07}$ |
| HAGLR      | -1.13 | -5.64 | $6.78 \times 10^{-07}$ |
| IGSF10     | -1.02 | -5.60 | $8.38 \times 10^{-07}$ |
| RN7SL8P    | -1.32 | -5.56 | $1.01 \times 10^{-06}$ |
| FOSB       | -1.43 | -5.63 | $7.29 \times 10^{-07}$ |
| SYNPR-AS1  | -1.31 | -5.55 | $1.03 \times 10^{-06}$ |
| SULT1E1    | -1.24 | -5.54 | $1.08 \times 10^{-06}$ |

|            |       |       |                        |
|------------|-------|-------|------------------------|
| SULT1C2    | -1.23 | -5.59 | $8.75 \times 10^{-07}$ |
| RS1        | -1.10 | -5.54 | $1.11 \times 10^{-06}$ |
| CAPN9      | -1.34 | -5.57 | $9.75 \times 10^{-07}$ |
| AC010998.1 | -1.18 | -5.54 | $1.11 \times 10^{-06}$ |
| LINC02446  | 1.25  | 5.53  | $1.13 \times 10^{-06}$ |
| AC024940.2 | 1.11  | 5.53  | $1.17 \times 10^{-06}$ |
| SLC46A2    | -1.29 | -5.54 | $1.08 \times 10^{-06}$ |
| LMO3       | -1.22 | -5.61 | $7.73 \times 10^{-07}$ |
| AC096734.1 | 1.02  | 5.52  | $1.18 \times 10^{-06}$ |
| AL031777.1 | 1.09  | 5.52  | $1.20 \times 10^{-06}$ |
| GADL1      | -1.13 | -5.52 | $1.21 \times 10^{-06}$ |
| CHIT1      | -1.44 | -5.58 | $8.94 \times 10^{-07}$ |
| LRRC18     | -1.24 | -5.51 | $1.25 \times 10^{-06}$ |
| HMGCS2     | -2.00 | -5.51 | $1.27 \times 10^{-06}$ |
| SLC6A4     | -1.31 | -5.51 | $1.28 \times 10^{-06}$ |
| AL117329.1 | 1.51  | 5.50  | $1.30 \times 10^{-06}$ |
| SORCS2     | -1.12 | -5.55 | $1.03 \times 10^{-06}$ |
| FOXD3-AS1  | 1.51  | 5.50  | $1.31 \times 10^{-06}$ |
| TMEM114    | -1.04 | -5.52 | $1.22 \times 10^{-06}$ |
| STEAP1B    | 1.04  | 5.50  | $1.32 \times 10^{-06}$ |
| CCL8       | 1.03  | 5.52  | $1.23 \times 10^{-06}$ |
| RXRG       | -1.25 | -5.49 | $1.38 \times 10^{-06}$ |
| KRT27      | -1.16 | -5.48 | $1.43 \times 10^{-06}$ |
| PRODH      | -1.39 | -5.54 | $1.09 \times 10^{-06}$ |
| RAD17P1    | -1.24 | -5.48 | $1.46 \times 10^{-06}$ |
| SULT1C2P1  | -1.17 | -5.47 | $1.49 \times 10^{-06}$ |
| HIST1H4D   | 1.17  | 5.47  | $1.53 \times 10^{-06}$ |
| CNGA4      | -1.16 | -5.47 | $1.53 \times 10^{-06}$ |
| LINC00525  | 1.19  | 5.47  | $1.54 \times 10^{-06}$ |
| TREH       | -1.02 | -5.47 | $1.54 \times 10^{-06}$ |
| SLPI       | -1.35 | -5.58 | $9.17 \times 10^{-07}$ |
| CFAP61     | -1.03 | -5.46 | $1.57 \times 10^{-06}$ |
| AADAC      | -1.67 | -5.47 | $1.55 \times 10^{-06}$ |
| COLCA1     | -1.11 | -5.50 | $1.32 \times 10^{-06}$ |
| HIST1H2BH  | 1.33  | 5.45  | $1.64 \times 10^{-06}$ |
| RGS6       | -1.41 | -5.45 | $1.64 \times 10^{-06}$ |
| HIST1H2AM  | 1.06  | 5.45  | $1.66 \times 10^{-06}$ |
| ALDOB      | -1.37 | -5.44 | $1.71 \times 10^{-06}$ |
| CA8        | -1.34 | -5.46 | $1.58 \times 10^{-06}$ |
| ITGB1-DT   | 1.15  | 5.43  | $1.84 \times 10^{-06}$ |
| KCNQ5-IT1  | 1.06  | 5.44  | $1.74 \times 10^{-06}$ |
| LINC00570  | -1.07 | -5.40 | $2.12 \times 10^{-06}$ |
| AC131097.3 | 1.18  | 5.39  | $2.20 \times 10^{-06}$ |
| AC005592.1 | -1.03 | -5.38 | $2.25 \times 10^{-06}$ |
| PI16       | -1.21 | -5.38 | $2.33 \times 10^{-06}$ |
| GSTA3      | -1.24 | -5.37 | $2.40 \times 10^{-06}$ |
| GSDMC      | 1.09  | 5.40  | $2.07 \times 10^{-06}$ |
| AL021328.1 | -1.13 | -5.37 | $2.43 \times 10^{-06}$ |
| LHFPL3     | -1.44 | -5.37 | $2.44 \times 10^{-06}$ |
| ATOH8      | -1.18 | -5.42 | $1.87 \times 10^{-06}$ |
| AC073862.2 | -1.09 | -5.36 | $2.55 \times 10^{-06}$ |
| ABCC12     | -1.15 | -5.36 | $2.57 \times 10^{-06}$ |
| CDH18      | 1.59  | 5.36  | $2.54 \times 10^{-06}$ |
| AL049830.3 | 1.07  | 5.35  | $2.62 \times 10^{-06}$ |
| GBX2       | 1.29  | 5.35  | $2.61 \times 10^{-06}$ |
| ARSE       | -1.35 | -5.40 | $2.07 \times 10^{-06}$ |
| PKHD1      | -1.43 | -5.35 | $2.59 \times 10^{-06}$ |
| ZDHHC11B   | -1.21 | -5.38 | $2.34 \times 10^{-06}$ |
| VWA3A      | -1.39 | -5.35 | $2.65 \times 10^{-06}$ |
| CFAP65     | -1.34 | -5.33 | $2.84 \times 10^{-06}$ |
| TWIST1     | 1.15  | 5.33  | $2.83 \times 10^{-06}$ |
| RETNLB     | 1.15  | 5.32  | $3.01 \times 10^{-06}$ |
| SORCS1     | -1.22 | -5.31 | $3.23 \times 10^{-06}$ |
| AL135999.3 | -1.57 | -5.32 | $3.04 \times 10^{-06}$ |
| ADRA2A     | -1.11 | -5.35 | $2.68 \times 10^{-06}$ |
| CDKN2A     | 1.35  | 5.35  | $2.63 \times 10^{-06}$ |
| SLITRK3    | -1.18 | -5.29 | $3.41 \times 10^{-06}$ |
| AC005725.1 | -1.15 | -5.29 | $3.41 \times 10^{-06}$ |
| NPY1R      | -1.06 | -5.30 | $3.34 \times 10^{-06}$ |



|            |       |       |                        |
|------------|-------|-------|------------------------|
| AC010627.1 | -1.04 | -5.28 | $3.59 \times 10^{-06}$ |
| C20orf141  | 1.04  | 5.31  | $3.13 \times 10^{-06}$ |
| NMUR2      | -1.14 | -5.28 | $3.63 \times 10^{-06}$ |
| LRRC55     | -1.20 | -5.28 | $3.63 \times 10^{-06}$ |
| LINC01234  | 1.71  | 5.27  | $3.82 \times 10^{-06}$ |
| MS4A8      | -1.95 | -5.28 | $3.66 \times 10^{-06}$ |
| STEAP2-AS1 | 1.01  | 5.26  | $3.97 \times 10^{-06}$ |
| HIST1H1E   | 1.08  | 5.26  | $3.91 \times 10^{-06}$ |
| AC079467.1 | -1.47 | -5.26 | $3.95 \times 10^{-06}$ |
| CLUL1      | -1.01 | -5.28 | $3.71 \times 10^{-06}$ |
| HIST1H2AL  | 1.05  | 5.26  | $3.99 \times 10^{-06}$ |
| LINC01535  | 1.04  | 5.27  | $3.90 \times 10^{-06}$ |
| ALOX15B    | -1.19 | -5.34 | $2.75 \times 10^{-06}$ |
| ERICH3     | -1.76 | -5.27 | $3.88 \times 10^{-06}$ |
| CFAP46     | -1.28 | -5.26 | $3.91 \times 10^{-06}$ |
| CES1       | -1.22 | -5.34 | $2.73 \times 10^{-06}$ |
| SMIM6      | -1.02 | -5.28 | $3.70 \times 10^{-06}$ |
| PCDHAC2    | -1.01 | -5.27 | $3.89 \times 10^{-06}$ |
| BMP3       | -1.32 | -5.30 | $3.34 \times 10^{-06}$ |
| APOH       | -1.73 | -5.24 | $4.29 \times 10^{-06}$ |
| STAC2      | -1.14 | -5.23 | $4.56 \times 10^{-06}$ |
| SCN1A      | -1.36 | -5.23 | $4.47 \times 10^{-06}$ |
| AL591468.1 | 1.01  | 5.22  | $4.85 \times 10^{-06}$ |
| TEX19      | 1.27  | 5.21  | $4.90 \times 10^{-06}$ |
| CCDC198    | -1.85 | -5.21 | $4.88 \times 10^{-06}$ |
| VEPH1      | -1.07 | -5.26 | $3.97 \times 10^{-06}$ |
| DNAH17-AS1 | 1.07  | 5.22  | $4.83 \times 10^{-06}$ |
| AC087588.2 | 1.03  | 5.21  | $5.08 \times 10^{-06}$ |
| LINC00332  | -1.10 | -5.23 | $4.52 \times 10^{-06}$ |
| SRD5A2     | -1.49 | -5.21 | $4.93 \times 10^{-06}$ |
| AC005550.2 | -1.06 | -5.22 | $4.84 \times 10^{-06}$ |
| C4orf19    | -1.11 | -5.23 | $4.48 \times 10^{-06}$ |
| HHIP-AS1   | -1.21 | -5.22 | $4.85 \times 10^{-06}$ |
| APCDD1L    | 1.33  | 5.21  | $5.03 \times 10^{-06}$ |
| DNAI2      | -1.44 | -5.18 | $5.65 \times 10^{-06}$ |
| LINC00629  | 1.03  | 5.17  | $5.93 \times 10^{-06}$ |
| CRYM       | -1.37 | -5.22 | $4.68 \times 10^{-06}$ |
| DUOX2      | -1.32 | -5.20 | $5.25 \times 10^{-06}$ |
| ABCC8      | -1.39 | -5.16 | $6.08 \times 10^{-06}$ |
| HIST1H1D   | 1.29  | 5.16  | $6.19 \times 10^{-06}$ |
| AGR3       | -1.43 | -5.23 | $4.50 \times 10^{-06}$ |
| LANCL3     | -1.07 | -5.16 | $6.07 \times 10^{-06}$ |
| XKR4       | -1.08 | -5.15 | $6.52 \times 10^{-06}$ |
| AC093523.1 | -1.00 | -5.17 | $6.00 \times 10^{-06}$ |
| BRD9P2     | -1.04 | -5.14 | $6.94 \times 10^{-06}$ |
| FREM2      | -1.15 | -5.19 | $5.48 \times 10^{-06}$ |
| ELDR       | 1.06  | 5.13  | $7.00 \times 10^{-06}$ |
| DIRAS3     | -1.01 | -5.14 | $6.66 \times 10^{-06}$ |
| AC018781.1 | 1.12  | 5.12  | $7.37 \times 10^{-06}$ |
| AC120498.2 | -1.10 | -5.12 | $7.41 \times 10^{-06}$ |
| DLX2       | 1.13  | 5.13  | $7.19 \times 10^{-06}$ |
| NR5A1      | 1.08  | 5.12  | $7.58 \times 10^{-06}$ |
| OR2B6      | 1.04  | 5.11  | $7.66 \times 10^{-06}$ |
| HIF3A      | -1.21 | -5.16 | $6.18 \times 10^{-06}$ |
| LINC02323  | 1.06  | 5.11  | $7.60 \times 10^{-06}$ |
| SCNN1G     | -1.08 | -5.16 | $6.12 \times 10^{-06}$ |
| 14-Sep     | 1.05  | 5.14  | $6.92 \times 10^{-06}$ |
| LINC02568  | -1.19 | -5.10 | $8.06 \times 10^{-06}$ |
| AC007906.2 | -1.30 | -5.12 | $7.29 \times 10^{-06}$ |
| GRM5-AS1   | 1.01  | 5.09  | $8.55 \times 10^{-06}$ |
| AL645608.8 | 1.05  | 5.08  | $8.78 \times 10^{-06}$ |
| HHLA2      | -2.08 | -5.10 | $7.97 \times 10^{-06}$ |
| C9orf135   | -1.51 | -5.08 | $8.89 \times 10^{-06}$ |
| ADGRA1     | -1.16 | -5.07 | $9.10 \times 10^{-06}$ |
| AC012213.1 | 1.38  | 5.07  | $9.15 \times 10^{-06}$ |
| SNTG2      | -1.00 | -5.06 | $9.69 \times 10^{-06}$ |
| GREB1L     | 1.12  | 5.09  | $8.53 \times 10^{-06}$ |
| ST6GALNAC1 | -1.11 | -5.15 | $6.47 \times 10^{-06}$ |
| TSPAN8     | -1.49 | -5.13 | $7.05 \times 10^{-06}$ |

|             |       |       |                        |
|-------------|-------|-------|------------------------|
| PTCHD1      | -1.20 | -5.06 | $9.80 \times 10^{-06}$ |
| LUCAT1      | 1.24  | 5.07  | $9.38 \times 10^{-06}$ |
| HPR         | -1.09 | -5.04 | $1.06 \times 10^{-05}$ |
| AL139412.1  | 1.07  | 5.04  | $1.05 \times 10^{-05}$ |
| SH2D5       | 1.20  | 5.04  | $1.07 \times 10^{-05}$ |
| CA4         | -1.36 | -5.05 | $1.03 \times 10^{-05}$ |
| CCL7        | 1.16  | 5.04  | $1.05 \times 10^{-05}$ |
| HCN1        | -1.55 | -5.03 | $1.10 \times 10^{-05}$ |
| GGTLC2      | -1.09 | -5.03 | $1.11 \times 10^{-05}$ |
| FAM222A-AS1 | 1.03  | 5.03  | $1.10 \times 10^{-05}$ |
| LINC01671   | -1.22 | -5.05 | $1.01 \times 10^{-05}$ |
| AC010735.2  | 1.05  | 5.03  | $1.11 \times 10^{-05}$ |
| C2orf73     | -1.16 | -5.02 | $1.13 \times 10^{-05}$ |
| DIO3        | -1.06 | -5.03 | $1.12 \times 10^{-05}$ |
| SYNGR4      | 1.03  | 5.02  | $1.13 \times 10^{-05}$ |
| UCN3        | -1.70 | -5.02 | $1.17 \times 10^{-05}$ |
| FOSL1       | 1.01  | 5.06  | $9.69 \times 10^{-06}$ |
| AL390778.2  | -1.10 | -5.01 | $1.22 \times 10^{-05}$ |
| CCDC60      | -1.37 | -5.01 | $1.23 \times 10^{-05}$ |
| ACE2        | -1.10 | -5.03 | $1.09 \times 10^{-05}$ |
| HAS3        | -1.06 | -5.07 | $9.31 \times 10^{-06}$ |
| SHOC1       | 1.02  | 4.99  | $1.29 \times 10^{-05}$ |
| HIST1H3G    | 1.22  | 4.96  | $1.47 \times 10^{-05}$ |
| AZU1        | -1.10 | -4.96 | $1.49 \times 10^{-05}$ |
| C20orf85    | -2.00 | -4.96 | $1.47 \times 10^{-05}$ |
| LINC02555   | -1.47 | -4.95 | $1.55 \times 10^{-05}$ |
| CXCL11      | 1.05  | 4.99  | $1.32 \times 10^{-05}$ |
| C8B         | -1.54 | -4.94 | $1.60 \times 10^{-05}$ |
| TEX48       | 1.04  | 4.93  | $1.68 \times 10^{-05}$ |
| SRGAP3-AS2  | -1.79 | -4.93 | $1.71 \times 10^{-05}$ |
| HIST1H3C    | 1.08  | 4.92  | $1.74 \times 10^{-05}$ |
| CA10        | -1.95 | -4.92 | $1.75 \times 10^{-05}$ |
| LRRC52      | -1.28 | -4.92 | $1.80 \times 10^{-05}$ |
| MEGF11      | -1.25 | -4.93 | $1.71 \times 10^{-05}$ |
| CPA4        | 1.23  | 4.91  | $1.82 \times 10^{-05}$ |
| AC017048.3  | 1.03  | 4.91  | $1.83 \times 10^{-05}$ |
| WT1-AS      | 1.19  | 4.90  | $1.93 \times 10^{-05}$ |
| LINC02616   | 1.41  | 4.90  | $1.89 \times 10^{-05}$ |
| FGFR3       | -1.09 | -4.97 | $1.42 \times 10^{-05}$ |
| PSORS1C3    | -1.41 | -4.89 | $2.04 \times 10^{-05}$ |
| AC026992.2  | -1.01 | -4.89 | $2.04 \times 10^{-05}$ |
| LINC01224   | 1.49  | 4.89  | $2.01 \times 10^{-05}$ |
| AC243967.2  | -1.01 | -4.88 | $2.10 \times 10^{-05}$ |
| HOXA11-AS   | 1.27  | 4.87  | $2.16 \times 10^{-05}$ |
| NR0B2       | -1.52 | -4.89 | $2.01 \times 10^{-05}$ |
| NKX2-1      | -1.07 | -5.01 | $1.19 \times 10^{-05}$ |
| STMND1      | -1.30 | -4.88 | $2.08 \times 10^{-05}$ |
| SLC16A12    | -1.14 | -4.88 | $2.09 \times 10^{-05}$ |
| CAPN13      | -1.14 | -4.94 | $1.64 \times 10^{-05}$ |
| CHRM2       | -1.10 | -4.86 | $2.28 \times 10^{-05}$ |
| FAM83A      | 1.10  | 4.98  | $1.39 \times 10^{-05}$ |
| KLHDC7A     | -1.06 | -4.90 | $1.90 \times 10^{-05}$ |
| LY6K        | 1.82  | 4.88  | $2.10 \times 10^{-05}$ |
| HBB         | -1.14 | -4.92 | $1.77 \times 10^{-05}$ |
| AC012317.1  | -1.13 | -4.87 | $2.21 \times 10^{-05}$ |
| SLC10A2     | -1.30 | -4.85 | $2.39 \times 10^{-05}$ |
| NKX1-2      | 1.73  | 4.83  | $2.54 \times 10^{-05}$ |
| HIST1H2BF   | 1.13  | 4.82  | $2.66 \times 10^{-05}$ |
| CHST9       | -1.83 | -4.83 | $2.54 \times 10^{-05}$ |
| HIST1H2AD   | 1.20  | 4.82  | $2.66 \times 10^{-05}$ |
| PCDH10      | -1.01 | -4.82 | $2.65 \times 10^{-05}$ |
| AQP2        | -1.28 | -4.82 | $2.72 \times 10^{-05}$ |
| TNNT1       | 1.56  | 4.87  | $2.16 \times 10^{-05}$ |
| NT5C1A      | -1.19 | -4.80 | $2.87 \times 10^{-05}$ |
| AC092691.1  | -1.04 | -4.82 | $2.71 \times 10^{-05}$ |
| AC025259.3  | -1.02 | -4.81 | $2.82 \times 10^{-05}$ |
| AL512328.1  | -1.03 | -4.79 | $3.05 \times 10^{-05}$ |
| GAS2L2      | -1.26 | -4.80 | $2.91 \times 10^{-05}$ |
| GLYATL1P4   | -1.10 | -4.79 | $3.05 \times 10^{-05}$ |

|            |       |       |                        |
|------------|-------|-------|------------------------|
| AC004832.1 | -1.14 | -4.78 | $3.13 \times 10^{-05}$ |
| SP8        | 1.77  | 4.78  | $3.14 \times 10^{-05}$ |
| LILRP2     | 1.06  | 4.77  | $3.32 \times 10^{-05}$ |
| GLP2R      | -1.13 | -4.77 | $3.34 \times 10^{-05}$ |
| SPINK5     | -1.22 | -4.83 | $2.60 \times 10^{-05}$ |
| TPRG1LP1   | -1.06 | -4.76 | $3.40 \times 10^{-05}$ |
| TMEM212    | -1.41 | -4.76 | $3.43 \times 10^{-05}$ |
| LINC01804  | 1.27  | 4.76  | $3.37 \times 10^{-05}$ |
| LHFPL3-AS1 | -1.00 | -4.77 | $3.25 \times 10^{-05}$ |
| MS4A15     | -1.65 | -4.78 | $3.10 \times 10^{-05}$ |
| HSD17B2    | -1.40 | -4.77 | $3.33 \times 10^{-05}$ |
| PLA2G3     | -1.34 | -4.76 | $3.47 \times 10^{-05}$ |
| STMN2      | -1.20 | -4.75 | $3.61 \times 10^{-05}$ |
| CFAP77     | -1.29 | -4.75 | $3.59 \times 10^{-05}$ |
| IL13RA2    | -1.10 | -4.75 | $3.52 \times 10^{-05}$ |
| SNX18P7    | 1.09  | 4.73  | $3.82 \times 10^{-05}$ |
| SLC5A7     | -1.17 | -4.73 | $3.88 \times 10^{-05}$ |
| AC129507.2 | -1.04 | -4.73 | $3.82 \times 10^{-05}$ |
| ERN2       | -1.75 | -4.77 | $3.36 \times 10^{-05}$ |
| DPP10      | -1.54 | -4.74 | $3.78 \times 10^{-05}$ |
| DUSP5P1    | 1.12  | 4.71  | $4.16 \times 10^{-05}$ |
| FAM83A-AS1 | 1.03  | 4.74  | $3.65 \times 10^{-05}$ |
| CALML3-AS1 | 1.12  | 4.69  | $4.55 \times 10^{-05}$ |
| ANKRD66    | -1.36 | -4.69 | $4.65 \times 10^{-05}$ |
| ZSCAN4     | -1.23 | -4.68 | $4.71 \times 10^{-05}$ |
| C1orf158   | -1.47 | -4.68 | $4.70 \times 10^{-05}$ |
| AC012213.4 | 1.22  | 4.69  | $4.54 \times 10^{-05}$ |
| FOXD3      | 1.21  | 4.66  | $5.06 \times 10^{-05}$ |
| CCL17      | -1.07 | -4.69 | $4.63 \times 10^{-05}$ |
| FAM3D      | -1.22 | -4.69 | $4.66 \times 10^{-05}$ |
| MAGEE2     | -1.11 | -4.65 | $5.39 \times 10^{-05}$ |
| SOHLH1     | 1.12  | 4.67  | $4.98 \times 10^{-05}$ |
| C1QL1      | 1.02  | 4.65  | $5.46 \times 10^{-05}$ |
| LINC01819  | -1.01 | -4.65 | $5.44 \times 10^{-05}$ |
| LTF        | -1.40 | -4.75 | $3.63 \times 10^{-05}$ |
| HNF1A-AS1  | -1.55 | -4.64 | $5.53 \times 10^{-05}$ |
| ESRRG      | -1.09 | -4.65 | $5.37 \times 10^{-05}$ |
| CYCSP6     | 1.33  | 4.63  | $5.75 \times 10^{-05}$ |
| LGR5       | -1.12 | -4.65 | $5.47 \times 10^{-05}$ |
| RERGL      | -1.29 | -4.63 | $5.90 \times 10^{-05}$ |
| LRAT       | -1.04 | -4.66 | $5.23 \times 10^{-05}$ |
| FABP4      | -1.13 | -4.65 | $5.34 \times 10^{-05}$ |
| C1orf61    | 1.26  | 4.63  | $5.78 \times 10^{-05}$ |
| C12orf56   | 1.55  | 4.62  | $6.12 \times 10^{-05}$ |
| LRRC71     | -1.17 | -4.61 | $6.34 \times 10^{-05}$ |
| LINC01116  | 1.08  | 4.62  | $6.02 \times 10^{-05}$ |
| TRIM63     | -1.10 | -4.59 | $6.71 \times 10^{-05}$ |
| MST1L      | -1.11 | -4.64 | $5.52 \times 10^{-05}$ |
| AQP5       | -1.76 | -4.66 | $5.23 \times 10^{-05}$ |
| PRND       | -1.10 | -4.58 | $6.97 \times 10^{-05}$ |
| NTNG1      | -1.11 | -4.59 | $6.84 \times 10^{-05}$ |
| RIMS4      | -1.28 | -4.58 | $7.17 \times 10^{-05}$ |
| IL36RN     | 1.56  | 4.58  | $6.99 \times 10^{-05}$ |
| ISM2       | 1.11  | 4.57  | $7.48 \times 10^{-05}$ |
| SPOCK3     | -1.41 | -4.58 | $7.16 \times 10^{-05}$ |
| LINC01644  | -1.25 | -4.57 | $7.43 \times 10^{-05}$ |
| ADRB1      | -1.02 | -4.59 | $6.80 \times 10^{-05}$ |
| RIMS2      | 1.46  | 4.56  | $7.68 \times 10^{-05}$ |
| TEKT4      | -1.02 | -4.55 | $7.88 \times 10^{-05}$ |
| AL161618.1 | -1.04 | -4.55 | $8.01 \times 10^{-05}$ |
| GSTA1      | -1.48 | -4.60 | $6.65 \times 10^{-05}$ |
| AC226118.1 | -1.04 | -4.55 | $8.06 \times 10^{-05}$ |
| CPA6       | -1.23 | -4.54 | $8.19 \times 10^{-05}$ |
| MMP28      | -1.12 | -4.61 | $6.30 \times 10^{-05}$ |
| CXCL17     | -1.00 | -4.70 | $4.43 \times 10^{-05}$ |
| CLDN8      | -1.50 | -4.54 | $8.27 \times 10^{-05}$ |
| AC005515.1 | 1.05  | 4.53  | $8.78 \times 10^{-05}$ |
| LINC02577  | 1.53  | 4.53  | $8.66 \times 10^{-05}$ |
| PLA2G4E    | -1.20 | -4.54 | $8.23 \times 10^{-05}$ |

|               |       |       |                        |
|---------------|-------|-------|------------------------|
| CGREF1        | 1.00  | 4.55  | $7.93 \times 10^{-05}$ |
| C6orf222      | -1.31 | -4.51 | $9.31 \times 10^{-05}$ |
| IL17C         | 1.06  | 4.49  | $1.00 \times 10^{-04}$ |
| TEPP          | -1.14 | -4.50 | $9.58 \times 10^{-05}$ |
| AC078820.1    | 1.08  | 4.49  | 0.000102636            |
| AL357093.2    | -1.23 | -4.49 | 0.000101472            |
| IGF2BP1       | 1.81  | 4.49  | $9.97 \times 10^{-05}$ |
| CYP3A5        | -1.05 | -4.52 | $8.93 \times 10^{-05}$ |
| ACTL8         | 1.23  | 4.48  | 0.000102807            |
| EFCAB1        | -1.26 | -4.49 | $9.88 \times 10^{-05}$ |
| HBA2          | -1.02 | -4.51 | $9.16 \times 10^{-05}$ |
| NELL1         | -1.99 | -4.47 | 0.000110036            |
| CSAG3         | 1.38  | 4.46  | 0.000111563            |
| GRP           | -1.20 | -4.46 | 0.000115359            |
| SERTM1        | -1.24 | -4.44 | 0.000120805            |
| AC090809.1    | 1.29  | 4.51  | $9.43 \times 10^{-05}$ |
| AL713965.1    | -1.01 | -4.44 | 0.000121031            |
| C6orf118      | -1.37 | -4.44 | 0.000121927            |
| HOXA11        | 1.30  | 4.43  | 0.000126575            |
| FAM135B       | -1.04 | -4.42 | 0.000129891            |
| AP003481.1    | -1.02 | -4.45 | 0.000115683            |
| ELFN1-AS1     | 1.18  | 4.42  | 0.000133478            |
| B4GALNT4      | 1.16  | 4.47  | 0.000110033            |
| ADGB          | -1.23 | -4.40 | 0.000140546            |
| TPTEP1        | -1.11 | -4.45 | 0.000117502            |
| AC106875.1    | 1.23  | 4.43  | 0.000124469            |
| LINC02133     | -1.13 | -4.39 | 0.00014636             |
| LINC00964     | -1.01 | -4.41 | 0.000137954            |
| CFAP47        | -1.17 | -4.40 | 0.000141553            |
| TOX3          | -1.13 | -4.48 | 0.000104121            |
| BMP7          | -1.07 | -4.43 | 0.000127718            |
| AC078923.1    | 1.11  | 4.39  | 0.000150189            |
| RNF128        | -1.02 | -4.46 | 0.000112484            |
| SHISA2        | -1.08 | -4.44 | 0.000122417            |
| AC027281.1    | -1.04 | -4.37 | 0.000161192            |
| MROH9         | -1.04 | -4.33 | 0.000182385            |
| CSTP1         | -1.07 | -4.33 | 0.000185075            |
| RAB3B         | 1.22  | 4.37  | 0.000157922            |
| RMST          | -1.08 | -4.32 | 0.000192243            |
| PAPPA2        | -1.06 | -4.33 | 0.000188549            |
| SH3GL3        | -1.06 | -4.31 | 0.000198548            |
| CHRM3         | -1.01 | -4.34 | 0.000179245            |
| WT1           | 1.18  | 4.32  | 0.000193039            |
| KCNB1         | -1.05 | -4.31 | 0.000199852            |
| CSAG1         | 1.69  | 4.30  | 0.000208666            |
| MAGEA3        | 2.13  | 4.30  | 0.000208682            |
| ZIC2          | 1.55  | 4.31  | 0.00020387             |
| G2E3-AS1      | 1.17  | 4.34  | 0.000177119            |
| TEKT1         | -1.48 | -4.31 | 0.000198575            |
| AC124067.4    | -1.14 | -4.29 | 0.000215749            |
| AC091806.1    | -1.04 | -4.29 | 0.000214278            |
| MYBPHL        | -1.33 | -4.31 | 0.000197667            |
| HNF4A         | -1.56 | -4.30 | 0.000208214            |
| MMP12         | 1.14  | 4.38  | 0.000152879            |
| AP002478.1    | 1.11  | 4.27  | 0.000230687            |
| ADH1C         | -1.35 | -4.32 | 0.00019432             |
| LINC02489     | -1.17 | -4.28 | 0.000225915            |
| AC133785.1    | 1.17  | 4.27  | 0.000230347            |
| OLIG1         | -1.06 | -4.27 | 0.000235917            |
| TRHD × 10-AS1 | -1.03 | -4.26 | 0.000241351            |
| SERPIND1      | -1.43 | -4.30 | 0.000208943            |
| AF279873.3    | 1.03  | 4.34  | 0.000178848            |
| TPSD1         | -1.23 | -4.27 | 0.000231515            |
| HOXA10        | 1.33  | 4.26  | 0.000237509            |
| MKRN9P        | 1.01  | 4.25  | 0.000254431            |
| DPPA3P2       | -1.00 | -4.23 | 0.000270385            |
| GFY           | 1.16  | 4.24  | 0.00026622             |
| GAL3ST2       | 1.03  | 4.23  | 0.000274656            |
| LRRC74B       | -1.15 | -4.22 | 0.000280471            |

|            |       |       |             |
|------------|-------|-------|-------------|
| RIMBP2     | -1.30 | -4.22 | 0.000285547 |
| CST2       | -1.05 | -4.23 | 0.000270458 |
| SFRP5      | -1.18 | -4.21 | 0.000292841 |
| DUSP9      | 1.22  | 4.22  | 0.000280687 |
| MAPK4      | -1.30 | -4.22 | 0.000281317 |
| POU4F1     | 1.33  | 4.20  | 0.000301311 |
| LHX1-DT    | 1.17  | 4.22  | 0.000285202 |
| TMEM213    | -1.22 | -4.23 | 0.000276147 |
| CFAP100    | -1.00 | -4.20 | 0.000299491 |
| LINC02122  | -1.19 | -4.19 | 0.000315844 |
| FOXQ1      | -1.17 | -4.27 | 0.000229382 |
| CSAG2      | 1.34  | 4.22  | 0.000285285 |
| CYP2C18    | -1.21 | -4.21 | 0.000290268 |
| PHACTR3    | -1.19 | -4.24 | 0.000257347 |
| FYB2       | -1.10 | -4.20 | 0.000300142 |
| ITPR1D1    | -1.54 | -4.18 | 0.000323764 |
| AC025154.2 | -1.38 | -4.19 | 0.000317708 |
| AC131532.1 | 1.19  | 4.19  | 0.000316212 |
| ASTN1      | -1.03 | -4.16 | 0.000352007 |
| AC010789.1 | 1.19  | 4.16  | 0.000353671 |
| AP005435.1 | -1.14 | -4.14 | 0.000369115 |
| ADGRD1-AS1 | -1.33 | -4.17 | 0.000331986 |
| GCNT3      | -1.07 | -4.25 | 0.000255474 |
| PITX1      | 1.17  | 4.21  | 0.000289074 |
| LINC02532  | -1.10 | -4.13 | 0.000386017 |
| APOBEC4    | -1.23 | -4.13 | 0.000392716 |
| PRIMA1     | -1.01 | -4.13 | 0.000394199 |
| MSLN       | -1.67 | -4.28 | 0.000225934 |
| FGF5       | 1.10  | 4.11  | 0.000418903 |
| TTC29      | -1.22 | -4.10 | 0.000425965 |
| DLL3       | 1.37  | 4.11  | 0.000416423 |
| KHDC1L     | 1.11  | 4.09  | 0.000446716 |
| PLD5       | -1.23 | -4.13 | 0.00039475  |
| AC078925.4 | -1.26 | -4.13 | 0.000382802 |
| USH1G      | 1.11  | 4.08  | 0.000468651 |
| CYP4F26P   | 1.05  | 4.07  | 0.00047496  |
| LGALS4     | -1.49 | -4.12 | 0.000401755 |
| C11orf97   | -1.14 | -4.07 | 0.000486512 |
| SP9        | 1.25  | 4.10  | 0.000433649 |
| CDH16      | -1.19 | -4.06 | 0.00050256  |
| TUBA4B     | -1.05 | -4.07 | 0.00048261  |
| KIAA2012   | -1.05 | -4.05 | 0.000515504 |
| CWH43      | -1.23 | -4.04 | 0.000535445 |
| CAPSL      | -1.26 | -4.05 | 0.000510525 |
| SEMA3E     | -1.12 | -4.10 | 0.000428744 |
| SPAG6      | -1.34 | -4.07 | 0.00048261  |
| ORM1       | -1.16 | -4.08 | 0.000460547 |
| CDHR4      | -1.20 | -4.05 | 0.000525479 |
| LINC01765  | -1.02 | -4.02 | 0.000583401 |
| AC010595.1 | 1.07  | 4.03  | 0.000560486 |
| ENPP3      | -1.12 | -4.07 | 0.00048279  |
| ALX1       | 1.14  | 3.99  | 0.000629981 |
| ORM2       | -1.15 | -4.03 | 0.000561236 |
| ALDH3A1    | -1.40 | -4.06 | 0.000494925 |
| HP         | -1.46 | -4.08 | 0.000473428 |
| SYT8       | -1.10 | -4.04 | 0.000539054 |
| HHATL      | -1.15 | -3.96 | 0.000698881 |
| ZIC5       | 1.28  | 3.96  | 0.000720805 |
| BEX1       | -1.04 | -3.96 | 0.000721152 |
| YBX2       | 1.10  | 4.00  | 0.000618998 |
| C11orf88   | -1.12 | -3.96 | 0.000703233 |
| COL11A1    | 1.23  | 4.06  | 0.000492737 |
| AC011632.1 | 1.10  | 3.93  | 0.000776848 |
| MAGEA6     | 1.90  | 3.93  | 0.000802098 |
| MIR663AHG  | -1.26 | -3.95 | 0.000748749 |
| BCAS1      | -1.06 | -4.01 | 0.000590347 |
| AC004836.1 | -1.10 | -3.91 | 0.000842677 |
| ABCA13     | -1.01 | -3.97 | 0.00068255  |
| IRX6       | -1.18 | -3.93 | 0.00080206  |

|            |       |       |             |
|------------|-------|-------|-------------|
| AC104031.1 | -1.01 | -3.89 | 0.000890967 |
| SPINK1     | -1.54 | -4.01 | 0.000600466 |
| LINC00973  | 1.35  | 3.87  | 0.000962957 |
| GSTA2      | -1.35 | -3.89 | 0.000890982 |
| AC023421.1 | -1.63 | -3.86 | 0.001007654 |
| CYP2F1     | -1.09 | -3.84 | 0.001072614 |
| AOC1       | -1.22 | -3.94 | 0.000757899 |
| DUOXA2     | -1.03 | -3.85 | 0.001053587 |
| LINC01257  | 1.01  | 3.86  | 0.000996413 |
| ECEL1P2    | -1.01 | -3.84 | 0.001080581 |
| ADGRF4     | 1.11  | 3.86  | 0.001010979 |
| LHX1       | 1.21  | 3.80  | 0.001244546 |
| SMIM31     | -1.31 | -3.83 | 0.001104861 |
| EPHA6      | 1.02  | 3.79  | 0.001277231 |
| PIH1D3     | -1.11 | -3.77 | 0.001336207 |
| CRABP1     | 1.33  | 3.79  | 0.001290595 |
| DPP10-AS1  | -1.21 | -3.78 | 0.001325788 |
| AC069277.1 | 1.02  | 3.77  | 0.001360599 |
| AC139749.1 | -1.08 | -3.77 | 0.001375147 |
| LINC01833  | 1.31  | 3.75  | 0.001466234 |
| NR1H4      | -1.05 | -3.73 | 0.001545879 |
| AL133320.1 | -1.02 | -3.73 | 0.001538086 |
| SERTM2     | -1.04 | -3.71 | 0.001663707 |
| CES1P1     | -1.02 | -3.71 | 0.001659211 |
| CALML3     | 1.19  | 3.70  | 0.001703516 |
| AC027288.1 | -1.13 | -3.71 | 0.001673953 |
| DSCR8      | 1.18  | 3.70  | 0.001684512 |
| LINC01108  | -1.15 | -3.67 | 0.001866007 |
| C1orf141   | -1.02 | -3.67 | 0.001894784 |
| NEFL       | -1.10 | -3.67 | 0.001901692 |
| LINC02241  | 1.08  | 3.71  | 0.001663707 |
| AL160271.1 | 1.12  | 3.73  | 0.001524866 |
| DRAIC      | -1.21 | -3.70 | 0.001697169 |
| ITLN2      | -1.15 | -3.65 | 0.002027936 |
| AC061975.6 | 1.13  | 3.64  | 0.002095266 |
| AZGP1      | -1.29 | -3.75 | 0.001434001 |
| PLA2G12B   | -1.25 | -3.65 | 0.001988561 |
| POPDC3     | 1.16  | 3.64  | 0.002069184 |
| PIP        | -1.22 | -3.63 | 0.002160426 |
| SLC44A5    | -1.01 | -3.70 | 0.001727356 |
| AC008870.5 | -1.04 | -3.60 | 0.002353969 |
| AC103702.2 | 1.15  | 3.59  | 0.002479805 |
| LDLRAD1    | -1.03 | -3.64 | 0.002109249 |
| CHRNA9     | 1.29  | 3.58  | 0.002514906 |
| S100A7     | 1.21  | 3.55  | 0.002754155 |
| MUC21      | -1.31 | -3.64 | 0.002064773 |
| PCSK1      | 1.22  | 3.55  | 0.002788205 |
| CTAG2      | 1.19  | 3.49  | 0.003364975 |
| MYEOV      | 1.11  | 3.55  | 0.002743192 |
| SLC13A2    | -1.40 | -3.46 | 0.00365756  |
| ANKS4B     | -1.27 | -3.45 | 0.003720041 |
| SLC6A15    | 1.14  | 3.44  | 0.003937918 |
| PWWP3B     | -1.04 | -3.47 | 0.003556151 |
| PRAME      | 1.54  | 3.49  | 0.003345917 |
| MAGEA11    | 1.06  | 3.46  | 0.003669708 |
| AP005233.2 | 1.06  | 3.41  | 0.004237505 |
| PAX7       | -1.62 | -3.41 | 0.004248404 |
| AMBP       | -1.11 | -3.45 | 0.003801915 |
| CACNG6     | -1.08 | -3.41 | 0.004279644 |
| GABRB3     | -1.02 | -3.43 | 0.004008946 |
| NFE4       | 1.08  | 3.35  | 0.005123645 |
| STOML3     | -1.05 | -3.33 | 0.005363812 |
| HNFI1A     | -1.11 | -3.33 | 0.005465114 |
| HHIPL2     | 1.12  | 3.36  | 0.004884164 |
| GYG2P1     | -1.22 | -3.28 | 0.006186347 |
| DUSP13     | 1.11  | 3.30  | 0.005892981 |
| LINC01446  | 1.12  | 3.28  | 0.006200462 |
| SLC5A1     | -1.15 | -3.33 | 0.005327551 |
| HOXA13     | 1.05  | 3.26  | 0.006550171 |

|            |       |       |             |
|------------|-------|-------|-------------|
| AC011297.1 | -1.22 | -3.26 | 0.006711992 |
| SERPINA4   | -1.26 | -3.17 | 0.008563421 |
| FAR2P1     | 1.21  | 3.14  | 0.009248678 |
| GPR158     | 1.00  | 3.17  | 0.008570117 |
| LIN28B     | 1.12  | 3.17  | 0.00849573  |
| MAGEC2     | 1.27  | 3.14  | 0.009401317 |
| SCGB2A1    | -1.01 | -3.14 | 0.009248249 |
| VSIG1      | -1.09 | -3.23 | 0.007232788 |
| LINC01419  | 1.10  | 3.16  | 0.008859269 |
| B3GNT6     | -1.16 | -3.19 | 0.008110565 |
| SLC14A2    | -1.14 | -3.10 | 0.010313892 |
| TMEM59L    | -1.01 | -3.19 | 0.008183556 |
| CNMD       | -1.25 | -3.07 | 0.011402859 |
| TSPAN19    | -1.06 | -3.08 | 0.011125151 |
| SLC5A8     | -1.12 | -3.07 | 0.011351635 |
| CST1       | -1.09 | -3.12 | 0.00997865  |
| KLK11      | -1.10 | -3.12 | 0.009748285 |
| DACT2      | -1.04 | -3.02 | 0.013090413 |
| REG1A      | -1.04 | -2.95 | 0.015603231 |
| IL37       | -1.12 | -2.94 | 0.016012936 |
| SYT13      | -1.26 | -2.95 | 0.015720619 |
| MAGEA12    | 1.25  | 2.88  | 0.018566865 |
| COL25A1    | -1.08 | -2.88 | 0.018590899 |
| EREG       | 1.06  | 2.90  | 0.017612162 |
| C1QL2      | -1.02 | -2.77 | 0.024719272 |
| GLB1L3     | -1.13 | -2.81 | 0.022142152 |
| BPIFB2     | -1.21 | -2.74 | 0.026453855 |
| MUC5B      | -1.21 | -2.84 | 0.020601021 |

**Table S3.** The DEGs identified between mitophagy groups in TCGA-LUAD training cohort.

| Gene       | HR (95%CI)       | p      |
|------------|------------------|--------|
| ADGRD1     | 0.45 (0.31-0.65) | <0.001 |
| OLFM1      | 0.47 (0.33-0.67) | <0.001 |
| BTG2       | 0.47 (0.33-0.68) | <0.001 |
| AC037441.1 | 0.47 (0.33-0.68) | <0.001 |
| DPYSL2     | 0.48 (0.33-0.68) | <0.001 |
| PRDM16     | 0.48 (0.33-0.69) | <0.001 |
| PRMT8      | 0.48 (0.33-0.69) | <0.001 |
| PNMA2      | 0.48 (0.33-0.69) | <0.001 |
| B3GALT2    | 0.49 (0.34-0.7)  | <0.001 |
| DAAM2      | 0.5 (0.35-0.71)  | <0.001 |
| AC145124.1 | 0.51 (0.35-0.73) | <0.001 |
| VWA2       | 0.51 (0.35-0.73) | <0.001 |
| HSD17B6    | 0.51 (0.36-0.73) | <0.001 |
| TMEM130    | 0.51 (0.36-0.73) | <0.001 |
| LINC02038  | 0.51 (0.36-0.73) | <0.001 |
| CTSH       | 0.52 (0.36-0.74) | <0.001 |
| XCR1       | 0.52 (0.36-0.75) | <0.001 |
| NT5C1A     | 0.52 (0.36-0.75) | <0.001 |
| SCNN1B     | 0.52 (0.36-0.75) | <0.001 |
| AC236972.3 | 0.53 (0.37-0.75) | <0.001 |
| AC004947.2 | 0.53 (0.37-0.76) | 0.001  |
| CHRD1      | 0.53 (0.37-0.76) | <0.001 |
| FCER1A     | 0.53 (0.37-0.76) | <0.001 |
| LINC00982  | 0.53 (0.37-0.77) | 0.001  |
| PTCSC3     | 0.53 (0.37-0.76) | 0.001  |
| GGT6       | 0.54 (0.37-0.77) | 0.001  |
| TEPP       | 0.54 (0.37-0.77) | 0.001  |
| AL133466.1 | 0.54 (0.37-0.77) | 0.001  |
| AL355974.2 | 0.54 (0.38-0.77) | 0.001  |
| LINC01644  | 0.54 (0.38-0.78) | 0.001  |
| SFTPB      | 0.54 (0.38-0.78) | 0.001  |
| NR0B2      | 0.54 (0.38-0.78) | 0.001  |
| AC007207.2 | 0.54 (0.38-0.78) | 0.001  |
| AC133963.1 | 0.55 (0.38-0.78) | 0.001  |
| NAPSA      | 0.55 (0.38-0.78) | 0.001  |
| SLIT3      | 0.55 (0.38-0.79) | 0.001  |

|            |                  |       |
|------------|------------------|-------|
| ELN        | 0.55 (0.38-0.79) | 0.001 |
| CACNA2D2   | 0.55 (0.38-0.79) | 0.001 |
| KLHDC7A    | 0.55 (0.39-0.79) | 0.001 |
| COLCA1     | 0.55 (0.38-0.8)  | 0.001 |
| DPPA3P2    | 0.56 (0.39-0.8)  | 0.001 |
| SYNPR-AS1  | 0.56 (0.39-0.81) | 0.002 |
| EDA2R      | 0.56 (0.39-0.81) | 0.002 |
| AL162511.1 | 0.57 (0.4-0.81)  | 0.002 |
| CLUL1      | 0.57 (0.4-0.82)  | 0.002 |
| MS4A2      | 0.57 (0.4-0.81)  | 0.002 |
| SUSD2      | 0.57 (0.4-0.82)  | 0.002 |
| RS1        | 0.57 (0.4-0.82)  | 0.002 |
| SFTA1P     | 0.57 (0.4-0.82)  | 0.002 |
| FOSB       | 0.57 (0.4-0.82)  | 0.003 |
| C14orf180  | 0.58 (0.4-0.82)  | 0.002 |
| SEC14L6    | 0.58 (0.4-0.82)  | 0.002 |
| LINC01819  | 0.58 (0.4-0.82)  | 0.002 |
| ADRA2A     | 0.58 (0.4-0.82)  | 0.003 |
| HPGDS      | 0.58 (0.4-0.83)  | 0.003 |
| MALL       | 0.58 (0.4-0.83)  | 0.003 |
| TMEM252    | 0.58 (0.4-0.83)  | 0.003 |
| RCAN2      | 0.58 (0.41-0.83) | 0.003 |
| CADM3-AS1  | 0.58 (0.41-0.83) | 0.003 |
| LRRC52-AS1 | 0.58 (0.41-0.83) | 0.003 |
| VEGFD      | 0.58 (0.41-0.84) | 0.003 |
| AC091806.1 | 0.58 (0.41-0.83) | 0.003 |
| HMCN2      | 0.58 (0.41-0.83) | 0.003 |
| ABI3BP     | 0.58 (0.41-0.83) | 0.003 |
| CX3CR1     | 0.58 (0.41-0.83) | 0.003 |
| CD1E       | 0.59 (0.41-0.84) | 0.003 |
| AC046195.1 | 0.59 (0.41-0.84) | 0.004 |
| SIGLEC6    | 0.59 (0.41-0.84) | 0.004 |
| AC008878.3 | 0.59 (0.41-0.84) | 0.004 |
| GATA1      | 0.59 (0.41-0.84) | 0.004 |
| RNASE1     | 0.59 (0.41-0.84) | 0.003 |
| KCNA4      | 0.59 (0.41-0.84) | 0.004 |
| BRD9P2     | 0.59 (0.41-0.84) | 0.004 |
| AP003064.2 | 0.59 (0.41-0.84) | 0.004 |
| MGP        | 0.59 (0.41-0.84) | 0.004 |
| C1QTNF7    | 0.59 (0.42-0.85) | 0.004 |
| LINC00261  | 0.59 (0.42-0.85) | 0.004 |
| CYP4B1     | 0.59 (0.42-0.85) | 0.004 |
| SELENOP    | 0.59 (0.42-0.85) | 0.004 |
| TMEM163    | 0.6 (0.42-0.85)  | 0.004 |
| P2RY12     | 0.6 (0.42-0.85)  | 0.004 |
| CD1B       | 0.6 (0.42-0.85)  | 0.004 |
| C10orf105  | 0.6 (0.42-0.85)  | 0.005 |
| CRTAC1     | 0.6 (0.42-0.85)  | 0.005 |
| CD207      | 0.6 (0.42-0.85)  | 0.005 |
| NFIX       | 0.6 (0.42-0.86)  | 0.005 |
| MAOA       | 0.6 (0.42-0.86)  | 0.005 |
| HPSE2      | 0.6 (0.42-0.86)  | 0.005 |
| SLC16A11   | 0.6 (0.42-0.86)  | 0.005 |
| ACSM5      | 0.6 (0.42-0.86)  | 0.005 |
| TMPRSS2    | 0.6 (0.42-0.86)  | 0.005 |
| AC073862.2 | 0.6 (0.42-0.86)  | 0.005 |
| RPS29P11   | 0.6 (0.42-0.86)  | 0.005 |
| AC023421.1 | 0.6 (0.42-0.86)  | 0.005 |
| CCR6       | 0.6 (0.42-0.86)  | 0.006 |
| PPP1R1B    | 0.6 (0.42-0.86)  | 0.006 |
| CLEC3B     | 0.6 (0.42-0.86)  | 0.005 |
| TNS1       | 0.6 (0.42-0.86)  | 0.006 |
| ASTN1      | 0.6 (0.42-0.86)  | 0.005 |
| GCSAML     | 0.6 (0.42-0.86)  | 0.006 |
| AGER       | 0.61 (0.42-0.87) | 0.006 |
| LINC01750  | 0.61 (0.42-0.86) | 0.006 |
| CHIAP2     | 0.61 (0.43-0.87) | 0.006 |
| SORCS1     | 0.61 (0.43-0.87) | 0.006 |
| ZSCAN4     | 0.61 (0.43-0.87) | 0.007 |



|             |                  |       |
|-------------|------------------|-------|
| AC012085.2  | 0.61 (0.43-0.87) | 0.007 |
| GRIA1       | 0.61 (0.43-0.87) | 0.007 |
| SCUBE2      | 0.61 (0.43-0.88) | 0.007 |
| C16orf89    | 0.61 (0.43-0.87) | 0.007 |
| KCNQ1       | 0.61 (0.43-0.88) | 0.007 |
| ADGRF5      | 0.61 (0.43-0.88) | 0.007 |
| FCGBP       | 0.61 (0.43-0.88) | 0.007 |
| ST6GALNAC1  | 0.61 (0.43-0.88) | 0.007 |
| CCL17       | 0.62 (0.43-0.88) | 0.007 |
| PGM5        | 0.62 (0.43-0.88) | 0.007 |
| IRX2        | 0.62 (0.43-0.88) | 0.008 |
| DNASE2B     | 0.62 (0.43-0.88) | 0.007 |
| LANCL3      | 0.62 (0.43-0.88) | 0.008 |
| RAB44       | 0.62 (0.43-0.88) | 0.008 |
| DLEC1       | 0.62 (0.43-0.88) | 0.008 |
| KCNS2       | 0.62 (0.43-0.88) | 0.008 |
| SLC44A4     | 0.62 (0.43-0.88) | 0.008 |
| CCL14       | 0.62 (0.43-0.88) | 0.008 |
| FO681492.1  | 0.62 (0.43-0.88) | 0.008 |
| CD1A        | 0.62 (0.43-0.88) | 0.008 |
| CHIA        | 0.62 (0.44-0.88) | 0.008 |
| HSD17B13    | 0.62 (0.43-0.88) | 0.009 |
| CYP4Z1      | 0.62 (0.43-0.89) | 0.009 |
| FAM189A2    | 0.62 (0.43-0.89) | 0.009 |
| CST5        | 0.62 (0.44-0.88) | 0.008 |
| CLEC9A      | 0.62 (0.44-0.88) | 0.008 |
| PLA2G1B     | 0.62 (0.44-0.89) | 0.009 |
| AL008733.1  | 0.62 (0.44-0.89) | 0.009 |
| HSPB7       | 0.62 (0.44-0.89) | 0.009 |
| EDN3        | 0.62 (0.44-0.89) | 0.01  |
| CLEC4F      | 0.62 (0.44-0.89) | 0.009 |
| AC073862.5  | 0.62 (0.44-0.89) | 0.009 |
| TYRP1       | 0.62 (0.44-0.89) | 0.01  |
| RAI2        | 0.62 (0.44-0.89) | 0.009 |
| SFTPD       | 0.62 (0.44-0.89) | 0.01  |
| ERVFRD-1    | 0.62 (0.44-0.89) | 0.009 |
| PLA2G3      | 0.63 (0.44-0.89) | 0.009 |
| KLK11       | 0.63 (0.44-0.9)  | 0.01  |
| MUSK        | 0.63 (0.44-0.89) | 0.01  |
| SPARCL1     | 0.63 (0.44-0.9)  | 0.011 |
| AC105254.2  | 0.63 (0.44-0.9)  | 0.011 |
| STAC2       | 0.63 (0.44-0.9)  | 0.011 |
| AC004947.1  | 0.63 (0.44-0.9)  | 0.011 |
| ZDHHC11B    | 0.63 (0.44-0.9)  | 0.012 |
| SLC18A2     | 0.63 (0.44-0.91) | 0.013 |
| RIC3        | 0.63 (0.44-0.9)  | 0.012 |
| RMST        | 0.63 (0.44-0.9)  | 0.012 |
| ABCC12      | 0.64 (0.44-0.91) | 0.012 |
| SLC34A2     | 0.64 (0.44-0.91) | 0.013 |
| MS4A15      | 0.64 (0.44-0.91) | 0.013 |
| TPPP        | 0.64 (0.44-0.91) | 0.013 |
| C5orf38     | 0.64 (0.45-0.91) | 0.012 |
| AL157895.1  | 0.64 (0.45-0.91) | 0.013 |
| ABCC8       | 0.64 (0.45-0.91) | 0.014 |
| PCDH15      | 0.64 (0.45-0.91) | 0.013 |
| ISLR2       | 0.64 (0.45-0.91) | 0.014 |
| KIAA0408    | 0.64 (0.45-0.91) | 0.013 |
| DRAIC       | 0.64 (0.45-0.91) | 0.014 |
| GDF10       | 0.64 (0.45-0.91) | 0.013 |
| CYP4F24P    | 0.64 (0.45-0.91) | 0.014 |
| ATP13A4     | 0.64 (0.45-0.92) | 0.014 |
| ADAMTS9-AS2 | 0.64 (0.45-0.91) | 0.013 |
| LINC02133   | 0.64 (0.45-0.92) | 0.015 |
| FHL5        | 0.64 (0.45-0.91) | 0.014 |
| CAVIN2      | 0.64 (0.45-0.91) | 0.014 |
| ADAMTS8     | 0.64 (0.45-0.91) | 0.014 |
| GALNT17     | 0.64 (0.45-0.92) | 0.015 |
| GGTLC5P     | 0.64 (0.45-0.92) | 0.015 |
| AC006994.2  | 0.64 (0.45-0.92) | 0.016 |

|            |                  |       |
|------------|------------------|-------|
| PEBP4      | 0.65 (0.45-0.92) | 0.015 |
| ADGRB3     | 0.65 (0.45-0.92) | 0.016 |
| MST1L      | 0.65 (0.45-0.92) | 0.016 |
| AC104035.1 | 0.65 (0.46-0.92) | 0.016 |
| RSP01      | 0.65 (0.45-0.93) | 0.017 |
| NEGR1      | 0.65 (0.45-0.92) | 0.017 |
| ALOX15B    | 0.65 (0.46-0.93) | 0.017 |
| CD1C       | 0.65 (0.46-0.93) | 0.017 |
| LMO3       | 0.65 (0.46-0.93) | 0.018 |
| FOXA2      | 0.65 (0.46-0.93) | 0.019 |
| PIGR       | 0.65 (0.46-0.93) | 0.018 |
| CAPN13     | 0.65 (0.46-0.93) | 0.018 |
| GFI1B      | 0.65 (0.46-0.93) | 0.017 |
| CNTN3      | 0.65 (0.46-0.93) | 0.018 |
| AL390778.2 | 0.65 (0.46-0.93) | 0.018 |
| RAP1GAP    | 0.65 (0.46-0.93) | 0.019 |
| MAB21L1    | 0.65 (0.46-0.93) | 0.018 |
| MFAP4      | 0.65 (0.46-0.93) | 0.019 |
| SFTPC      | 0.65 (0.46-0.93) | 0.019 |
| AC007671.1 | 0.65 (0.46-0.94) | 0.02  |
| FGF14      | 0.66 (0.46-0.93) | 0.019 |
| HMGCLL1    | 0.66 (0.46-0.93) | 0.019 |
| FOS        | 0.66 (0.46-0.94) | 0.02  |
| MAP6       | 0.66 (0.46-0.93) | 0.019 |
| LHFPL3-AS2 | 0.66 (0.46-0.93) | 0.019 |
| AC010998.1 | 0.66 (0.46-0.93) | 0.019 |
| ZNF366     | 0.66 (0.46-0.94) | 0.021 |
| MIR663AHG  | 0.66 (0.46-0.94) | 0.02  |
| ADAMTS7P3  | 0.66 (0.46-0.93) | 0.019 |
| BAAT       | 0.66 (0.46-0.94) | 0.02  |
| RN7SL8P    | 0.66 (0.46-0.94) | 0.021 |
| SHE        | 0.66 (0.46-0.94) | 0.022 |
| CHRM2      | 0.66 (0.46-0.94) | 0.02  |
| PLA2G12B   | 0.66 (0.46-0.94) | 0.02  |
| LRRC52     | 0.66 (0.46-0.94) | 0.022 |
| MIR4697HG  | 0.66 (0.46-0.95) | 0.024 |
| SLC13A2    | 0.66 (0.46-0.94) | 0.023 |
| SLC46A2    | 0.66 (0.47-0.94) | 0.022 |
| CPA3       | 0.66 (0.46-0.94) | 0.023 |
| INMT       | 0.66 (0.46-0.94) | 0.022 |
| WSCD2      | 0.66 (0.46-0.94) | 0.023 |
| GGTLC1     | 0.66 (0.47-0.94) | 0.022 |
| NR3C2      | 0.66 (0.46-0.94) | 0.023 |
| RASGRF1    | 0.66 (0.46-0.95) | 0.024 |
| ENAM       | 0.66 (0.47-0.94) | 0.022 |
| MYH11      | 0.66 (0.46-0.95) | 0.024 |
| KCND3      | 0.66 (0.47-0.95) | 0.024 |
| SEC14L3    | 0.66 (0.47-0.94) | 0.023 |
| CDKL2      | 0.66 (0.47-0.95) | 0.023 |
| SCN2B      | 0.66 (0.47-0.95) | 0.024 |
| SHISA2     | 0.66 (0.47-0.94) | 0.023 |
| RN7SKP51   | 0.66 (0.47-0.95) | 0.024 |
| CYBRD1     | 0.66 (0.47-0.95) | 0.024 |
| AC005165.1 | 0.66 (0.47-0.95) | 0.024 |
| ELN-AS1    | 0.66 (0.47-0.95) | 0.024 |
| LPAL2      | 0.67 (0.47-0.95) | 0.026 |
| RHOBTB2    | 0.67 (0.47-0.95) | 0.026 |
| C2orf40    | 0.67 (0.47-0.95) | 0.024 |
| MIR3189    | 0.67 (0.47-0.96) | 0.027 |
| ABCA3      | 0.67 (0.47-0.96) | 0.028 |
| AL445493.3 | 0.67 (0.47-0.96) | 0.027 |
| ABCA8      | 0.67 (0.47-0.95) | 0.026 |
| PENK       | 0.67 (0.47-0.95) | 0.025 |
| GAS2L2     | 0.67 (0.47-0.96) | 0.029 |
| AL135999.3 | 0.67 (0.47-0.95) | 0.026 |
| HLF        | 0.67 (0.47-0.96) | 0.028 |
| SLC8A3     | 0.67 (0.47-0.96) | 0.027 |
| KLF15      | 0.67 (0.47-0.96) | 0.028 |
| PARM1      | 0.67 (0.47-0.96) | 0.028 |

|             |                  |       |
|-------------|------------------|-------|
| PIFO        | 0.67 (0.47-0.96) | 0.029 |
| TMEM132E    | 0.67 (0.47-0.96) | 0.029 |
| PCDH20      | 0.67 (0.47-0.96) | 0.031 |
| HAGLR       | 0.68 (0.47-0.96) | 0.03  |
| C4A         | 0.68 (0.47-0.96) | 0.031 |
| LCN6        | 0.68 (0.47-0.96) | 0.03  |
| AC005884.1  | 0.68 (0.48-0.96) | 0.029 |
| FGF10       | 0.68 (0.47-0.96) | 0.031 |
| CPAMD8      | 0.68 (0.47-0.96) | 0.03  |
| ADGRF5P2    | 0.68 (0.47-0.96) | 0.031 |
| MYOM2       | 0.68 (0.48-0.96) | 0.03  |
| AC093523.1  | 0.68 (0.47-0.97) | 0.032 |
| SCTR        | 0.68 (0.48-0.97) | 0.033 |
| COLEC12     | 0.68 (0.48-0.97) | 0.032 |
| SIGLEC17P   | 0.68 (0.48-0.97) | 0.033 |
| ADRB3       | 0.68 (0.48-0.97) | 0.031 |
| LINC01936   | 0.68 (0.48-0.97) | 0.033 |
| CYP2A6      | 0.68 (0.48-0.97) | 0.033 |
| C1orf116    | 0.68 (0.48-0.97) | 0.033 |
| LINC02568   | 0.68 (0.48-0.97) | 0.034 |
| FOLR1       | 0.68 (0.48-0.97) | 0.035 |
| PHACTR1     | 0.68 (0.48-0.97) | 0.034 |
| LINC02519   | 0.68 (0.48-0.97) | 0.033 |
| FPGT-TNNI3K | 0.68 (0.48-0.98) | 0.036 |
| GPIHBP1     | 0.68 (0.48-0.97) | 0.035 |
| CXCL17      | 0.68 (0.48-0.98) | 0.036 |
| AP004608.1  | 0.68 (0.48-0.98) | 0.037 |
| F11         | 0.69 (0.48-0.98) | 0.037 |
| CA10        | 0.69 (0.48-0.98) | 0.037 |
| PI16        | 0.69 (0.48-0.97) | 0.035 |
| PRIMA1      | 0.69 (0.48-0.98) | 0.036 |
| MAGEE2      | 0.69 (0.48-0.98) | 0.037 |
| ECEL1P2     | 0.69 (0.48-0.98) | 0.036 |
| AC078925.4  | 0.69 (0.48-0.98) | 0.037 |
| CYP2B7P     | 0.69 (0.48-0.98) | 0.038 |
| PTGDS       | 0.69 (0.48-0.98) | 0.038 |
| AC022164.1  | 0.69 (0.48-0.98) | 0.039 |
| AP003481.1  | 0.69 (0.48-0.98) | 0.037 |
| DNAI2       | 0.69 (0.48-0.98) | 0.039 |
| TPSB2       | 0.69 (0.48-0.98) | 0.04  |
| VIPR1       | 0.69 (0.48-0.99) | 0.042 |
| SLC14A1     | 0.69 (0.48-0.98) | 0.04  |
| AC092071.1  | 0.69 (0.48-0.99) | 0.044 |
| BMX         | 0.69 (0.49-0.99) | 0.042 |
| TBX4        | 0.69 (0.49-0.99) | 0.042 |
| LHFPL3      | 0.69 (0.49-0.99) | 0.042 |
| AC096531.2  | 0.69 (0.49-0.99) | 0.042 |
| NR1H4       | 0.69 (0.49-0.99) | 0.042 |
| ITGA9       | 0.69 (0.49-0.99) | 0.043 |
| SERPIND1    | 0.7 (0.49-0.99)  | 0.043 |
| PRODH       | 0.7 (0.49-0.99)  | 0.045 |
| CFAP221     | 0.7 (0.49-0.99)  | 0.042 |
| SLC22A31    | 0.7 (0.49-0.99)  | 0.045 |
| IRX1        | 0.7 (0.49-0.99)  | 0.046 |
| ADGRD1-AS1  | 0.7 (0.49-0.99)  | 0.045 |
| SCGB3A2     | 0.7 (0.49-0.99)  | 0.046 |
| SHH         | 0.7 (0.49-1)     | 0.047 |
| MIR27A      | 0.7 (0.49-1)     | 0.047 |
| INMT-MINDY4 | 0.7 (0.49-0.99)  | 0.046 |
| OTC         | 0.7 (0.49-1)     | 0.047 |
| ART4        | 0.7 (0.49-0.99)  | 0.046 |
| PRELP       | 0.7 (0.49-1)     | 0.048 |
| AC093772.1  | 0.7 (0.49-0.99)  | 0.046 |
| RPL13AP17   | 0.7 (0.49-1)     | 0.049 |
| BPIFB2      | 0.7 (0.49-1)     | 0.048 |
| AC090092.1  | 0.7 (0.49-1)     | 0.049 |
| AC112907.2  | 1.42 (1-2.03)    | 0.049 |
| GUCA1A      | 1.43 (1-2.04)    | 0.049 |
| CCDC150     | 1.43 (1.01-2.04) | 0.046 |

|            |                  |       |
|------------|------------------|-------|
| STIL       | 1.44 (1.01-2.04) | 0.045 |
| HIST1H1E   | 1.44 (1.01-2.05) | 0.045 |
| AL138789.1 | 1.44 (1.01-2.04) | 0.045 |
| NCAPH      | 1.44 (1.01-2.04) | 0.043 |
| KIF2C      | 1.44 (1.01-2.04) | 0.043 |
| TWIST1     | 1.45 (1.01-2.06) | 0.042 |
| RAB3B      | 1.45 (1.01-2.07) | 0.041 |
| TYMSOS     | 1.45 (1.02-2.07) | 0.039 |
| RACGAP1    | 1.46 (1.02-2.07) | 0.037 |
| ADGRF4     | 1.46 (1.02-2.09) | 0.039 |
| AP000526.1 | 1.46 (1.02-2.08) | 0.036 |
| FDPS8      | 1.47 (1.03-2.09) | 0.036 |
| FAM83A-AS1 | 1.47 (1.03-2.09) | 0.034 |
| E2F1       | 1.47 (1.03-2.09) | 0.033 |
| AC005042.1 | 1.47 (1.03-2.1)  | 0.033 |
| ASF1B      | 1.47 (1.03-2.1)  | 0.032 |
| C1QL1      | 1.48 (1.04-2.1)  | 0.031 |
| CCNE2      | 1.48 (1.04-2.1)  | 0.031 |
| EPHA6      | 1.48 (1.04-2.11) | 0.031 |
| RAD54L     | 1.48 (1.04-2.1)  | 0.03  |
| PARPBP     | 1.48 (1.04-2.11) | 0.03  |
| AC012073.1 | 1.48 (1.04-2.11) | 0.029 |
| UHRF1      | 1.48 (1.04-2.11) | 0.029 |
| DNA2       | 1.48 (1.04-2.11) | 0.028 |
| TRAIP      | 1.48 (1.04-2.12) | 0.029 |
| RCOR2      | 1.49 (1.04-2.12) | 0.029 |
| HOXA13     | 1.49 (1.04-2.12) | 0.029 |
| CDC20      | 1.49 (1.05-2.12) | 0.027 |
| RECQL4     | 1.49 (1.05-2.12) | 0.027 |
| GPR19      | 1.49 (1.04-2.12) | 0.028 |
| ACTL8      | 1.49 (1.05-2.13) | 0.026 |
| RFC4       | 1.49 (1.05-2.13) | 0.026 |
| HIST1H2AM  | 1.49 (1.05-2.13) | 0.027 |
| LINC01116  | 1.5 (1.04-2.14)  | 0.028 |
| COL11A1    | 1.5 (1.05-2.14)  | 0.027 |
| HIST2H2AB  | 1.5 (1.05-2.14)  | 0.026 |
| NR5A1      | 1.5 (1.05-2.14)  | 0.025 |
| FGF5       | 1.5 (1.05-2.15)  | 0.026 |
| WT1-AS     | 1.51 (1.06-2.15) | 0.024 |
| HOXA11     | 1.51 (1.06-2.16) | 0.024 |
| KIF15      | 1.51 (1.06-2.15) | 0.022 |
| CKAP2L     | 1.51 (1.06-2.15) | 0.021 |
| KIF4A      | 1.51 (1.07-2.15) | 0.021 |
| OR51E1     | 1.51 (1.06-2.17) | 0.023 |
| IL36RN     | 1.52 (1.07-2.17) | 0.02  |
| EME1       | 1.52 (1.07-2.17) | 0.019 |
| LINC01213  | 1.52 (1.07-2.17) | 0.019 |
| MYBL2      | 1.53 (1.07-2.18) | 0.019 |
| SGO1       | 1.53 (1.07-2.17) | 0.018 |
| MKRN9P     | 1.53 (1.07-2.18) | 0.019 |
| TERT       | 1.53 (1.08-2.18) | 0.018 |
| AC012213.1 | 1.53 (1.07-2.18) | 0.018 |
| MCM4       | 1.53 (1.08-2.18) | 0.017 |
| ZWINT      | 1.53 (1.08-2.18) | 0.017 |
| MUC5B      | 1.55 (1.09-2.2)  | 0.015 |
| CDC25A     | 1.55 (1.09-2.21) | 0.015 |
| SHOC1      | 1.55 (1.08-2.21) | 0.016 |
| AC112777.1 | 1.55 (1.09-2.21) | 0.015 |
| KIF18A     | 1.55 (1.08-2.22) | 0.016 |
| NPM1P9     | 1.55 (1.08-2.23) | 0.017 |
| BIRC5      | 1.56 (1.09-2.22) | 0.015 |
| LINC02323  | 1.56 (1.09-2.22) | 0.015 |
| KPNA2      | 1.56 (1.09-2.22) | 0.014 |
| WDHD1      | 1.56 (1.09-2.22) | 0.014 |
| PITX1      | 1.56 (1.09-2.22) | 0.014 |
| AC027627.1 | 1.56 (1.1-2.22)  | 0.014 |
| LY6K       | 1.56 (1.09-2.22) | 0.014 |
| HPDL       | 1.56 (1.09-2.23) | 0.015 |
| HIST1H2BJ  | 1.56 (1.09-2.24) | 0.015 |

|            |                  |       |
|------------|------------------|-------|
| NCAPG      | 1.57 (1.1-2.23)  | 0.013 |
| C5orf34    | 1.57 (1.1-2.25)  | 0.012 |
| DLX2       | 1.58 (1.1-2.25)  | 0.012 |
| MYEOV      | 1.58 (1.1-2.26)  | 0.013 |
| CLSPN      | 1.58 (1.11-2.25) | 0.011 |
| STEAP2-AS1 | 1.58 (1.11-2.26) | 0.011 |
| DEPDC1     | 1.58 (1.11-2.26) | 0.011 |
| SGO2       | 1.58 (1.11-2.26) | 0.011 |
| UBE2T      | 1.59 (1.11-2.26) | 0.011 |
| FOSL1      | 1.59 (1.11-2.27) | 0.011 |
| ESPL1      | 1.59 (1.12-2.26) | 0.01  |
| BRCA1      | 1.59 (1.12-2.27) | 0.01  |
| DTL        | 1.59 (1.12-2.27) | 0.01  |
| SEPT14P12  | 1.59 (1.12-2.27) | 0.01  |
| RAD54B     | 1.6 (1.12-2.29)  | 0.009 |
| ORC1       | 1.6 (1.12-2.28)  | 0.009 |
| EIF4EBP1   | 1.61 (1.12-2.3)  | 0.01  |
| CDC45      | 1.61 (1.13-2.29) | 0.008 |
| SBSN       | 1.61 (1.13-2.29) | 0.009 |
| AC006329.1 | 1.61 (1.13-2.3)  | 0.009 |
| EREG       | 1.61 (1.13-2.3)  | 0.008 |
| ORC6       | 1.62 (1.13-2.31) | 0.008 |
| RRM2       | 1.62 (1.13-2.31) | 0.008 |
| CENPA      | 1.62 (1.13-2.31) | 0.008 |
| RIMS2      | 1.62 (1.13-2.31) | 0.008 |
| POLR3G     | 1.62 (1.13-2.32) | 0.009 |
| DSCC1      | 1.62 (1.14-2.31) | 0.008 |
| MND1       | 1.62 (1.13-2.32) | 0.008 |
| AURKA      | 1.62 (1.14-2.31) | 0.008 |
| CENPF      | 1.63 (1.14-2.32) | 0.007 |
| AC068228.1 | 1.63 (1.14-2.33) | 0.007 |
| CTSV       | 1.63 (1.14-2.33) | 0.007 |
| GINS4      | 1.63 (1.15-2.33) | 0.007 |
| BUB1       | 1.64 (1.15-2.33) | 0.007 |
| NDC80      | 1.64 (1.15-2.33) | 0.007 |
| UBE2S      | 1.64 (1.14-2.34) | 0.007 |
| TTK        | 1.64 (1.15-2.33) | 0.006 |
| PSRC1      | 1.64 (1.15-2.34) | 0.007 |
| SPC24      | 1.64 (1.15-2.34) | 0.007 |
| DDIAS      | 1.64 (1.15-2.34) | 0.006 |
| CSAG1      | 1.64 (1.15-2.35) | 0.007 |
| RAD51AP1   | 1.64 (1.15-2.34) | 0.006 |
| BRIP1      | 1.65 (1.15-2.35) | 0.006 |
| AP002478.1 | 1.65 (1.15-2.35) | 0.006 |
| SPC25      | 1.65 (1.16-2.35) | 0.006 |
| HIST1H2BO  | 1.65 (1.15-2.35) | 0.006 |
| ESCO2      | 1.65 (1.16-2.36) | 0.006 |
| UBE2C      | 1.65 (1.16-2.36) | 0.006 |
| TEDC2      | 1.66 (1.16-2.36) | 0.006 |
| HJURP      | 1.67 (1.17-2.38) | 0.005 |
| CENPU      | 1.67 (1.17-2.39) | 0.005 |
| FAM72A     | 1.67 (1.17-2.39) | 0.004 |
| CDKN3      | 1.67 (1.17-2.39) | 0.005 |
| HIST1H3F   | 1.68 (1.16-2.41) | 0.005 |
| PCMTD1P3   | 1.68 (1.18-2.4)  | 0.004 |
| PRR11      | 1.68 (1.18-2.4)  | 0.004 |
| FAM111B    | 1.68 (1.18-2.41) | 0.004 |
| MTBP       | 1.69 (1.18-2.4)  | 0.004 |
| AC073585.1 | 1.69 (1.18-2.41) | 0.004 |
| PBK        | 1.69 (1.18-2.41) | 0.004 |
| CEP55      | 1.7 (1.19-2.42)  | 0.004 |
| PLK1       | 1.7 (1.19-2.42)  | 0.003 |
| SKA1       | 1.7 (1.19-2.42)  | 0.004 |
| GBX2       | 1.7 (1.19-2.43)  | 0.004 |
| HIST1H4D   | 1.7 (1.18-2.44)  | 0.004 |
| AUNIP      | 1.7 (1.19-2.44)  | 0.004 |
| RGS20      | 1.7 (1.19-2.44)  | 0.003 |
| KIF18B     | 1.71 (1.2-2.43)  | 0.003 |
| SHCBP1     | 1.71 (1.19-2.45) | 0.003 |

|            |                  |        |
|------------|------------------|--------|
| POC1A      | 1.71 (1.2-2.44)  | 0.003  |
| TYMS       | 1.71 (1.2-2.44)  | 0.003  |
| POLQ       | 1.72 (1.2-2.44)  | 0.003  |
| ASPM       | 1.72 (1.21-2.45) | 0.003  |
| NEK2       | 1.72 (1.2-2.45)  | 0.003  |
| FAM72C     | 1.72 (1.2-2.46)  | 0.003  |
| CENPW      | 1.72 (1.2-2.46)  | 0.003  |
| MCM10      | 1.72 (1.21-2.46) | 0.003  |
| HIST1H2AL  | 1.72 (1.2-2.47)  | 0.003  |
| TROAP      | 1.72 (1.21-2.46) | 0.003  |
| CHEK1      | 1.72 (1.21-2.46) | 0.003  |
| DLGAP5     | 1.73 (1.21-2.46) | 0.003  |
| PCLAF      | 1.73 (1.21-2.47) | 0.003  |
| ITGB1-DT   | 1.73 (1.2-2.48)  | 0.003  |
| TICRR      | 1.73 (1.21-2.46) | 0.002  |
| KIF11      | 1.73 (1.21-2.47) | 0.002  |
| PKMYT1     | 1.73 (1.21-2.47) | 0.002  |
| RAD51      | 1.73 (1.21-2.48) | 0.003  |
| XRCC2      | 1.74 (1.22-2.47) | 0.002  |
| ATP5MC1P4  | 1.74 (1.21-2.49) | 0.003  |
| CCNE1      | 1.74 (1.22-2.49) | 0.002  |
| OIP5       | 1.74 (1.22-2.49) | 0.002  |
| CDCA5      | 1.75 (1.22-2.49) | 0.002  |
| KIFC1      | 1.75 (1.22-2.49) | 0.002  |
| AURKB      | 1.75 (1.22-2.5)  | 0.002  |
| AC016877.3 | 1.75 (1.22-2.5)  | 0.002  |
| CDK1       | 1.75 (1.22-2.5)  | 0.002  |
| FBXO43     | 1.75 (1.23-2.5)  | 0.002  |
| TPX2       | 1.76 (1.23-2.51) | 0.002  |
| DUSP5P1    | 1.76 (1.24-2.51) | 0.002  |
| ECE2       | 1.76 (1.23-2.54) | 0.002  |
| NUSAP1     | 1.77 (1.24-2.52) | 0.002  |
| HIST1H2BF  | 1.77 (1.23-2.54) | 0.002  |
| AC016205.1 | 1.77 (1.24-2.53) | 0.002  |
| KIF20A     | 1.77 (1.24-2.54) | 0.002  |
| MELK       | 1.78 (1.24-2.54) | 0.002  |
| MAD2L1     | 1.78 (1.24-2.55) | 0.002  |
| KNL1       | 1.78 (1.25-2.54) | 0.001  |
| ERCC6L     | 1.79 (1.25-2.56) | 0.001  |
| AC099850.3 | 1.79 (1.25-2.57) | 0.001  |
| POLE2      | 1.79 (1.26-2.56) | 0.001  |
| CDCA2      | 1.8 (1.26-2.56)  | 0.001  |
| ACRV1      | 1.8 (1.26-2.58)  | 0.001  |
| UBE2SP1    | 1.8 (1.26-2.58)  | 0.001  |
| E2F7       | 1.8 (1.26-2.58)  | 0.001  |
| DEPDC1B    | 1.81 (1.26-2.59) | 0.001  |
| NUF2       | 1.81 (1.27-2.59) | 0.001  |
| ARHGEF39   | 1.81 (1.27-2.6)  | 0.001  |
| PLK4       | 1.81 (1.27-2.59) | 0.001  |
| CENPE      | 1.82 (1.27-2.6)  | 0.001  |
| GAL        | 1.82 (1.27-2.62) | 0.001  |
| SAPCD2     | 1.82 (1.27-2.61) | 0.001  |
| FAM83D     | 1.83 (1.27-2.62) | 0.001  |
| EXO1       | 1.83 (1.28-2.61) | 0.001  |
| CENPK      | 1.83 (1.28-2.63) | 0.001  |
| CCNB1      | 1.84 (1.28-2.63) | 0.001  |
| SPAG5      | 1.85 (1.29-2.64) | 0.001  |
| FAM72D     | 1.85 (1.29-2.65) | 0.001  |
| PIMREG     | 1.85 (1.29-2.65) | 0.001  |
| SKA3       | 1.85 (1.3-2.65)  | 0.001  |
| CDCA3      | 1.86 (1.3-2.66)  | 0.001  |
| PTTG1      | 1.87 (1.3-2.69)  | 0.001  |
| CCNB2      | 1.87 (1.31-2.68) | 0.001  |
| HASPIN     | 1.88 (1.31-2.68) | 0.001  |
| FAM83A     | 1.88 (1.31-2.7)  | 0.001  |
| GTSE1      | 1.88 (1.32-2.69) | 0.001  |
| GREB1L     | 1.89 (1.32-2.71) | 0.001  |
| HMMR       | 1.9 (1.33-2.72)  | <0.001 |
| CENPM      | 1.9 (1.32-2.73)  | 0.001  |

|            |                  |        |
|------------|------------------|--------|
| OR2B6      | 1.91 (1.34-2.73) | <0.001 |
| NEIL3      | 1.92 (1.33-2.77) | 0.001  |
| PRC1       | 1.92 (1.34-2.75) | <0.001 |
| STRIP2     | 1.92 (1.34-2.76) | <0.001 |
| ARHGAP11A  | 1.93 (1.35-2.76) | <0.001 |
| FOXM1      | 1.93 (1.35-2.76) | <0.001 |
| CCNA2      | 1.94 (1.35-2.77) | <0.001 |
| FAM72B     | 1.94 (1.35-2.78) | <0.001 |
| ANLN       | 1.94 (1.36-2.78) | <0.001 |
| BUB1B      | 1.95 (1.36-2.79) | <0.001 |
| TK1        | 1.96 (1.36-2.81) | <0.001 |
| KIF23      | 1.96 (1.37-2.8)  | <0.001 |
| VGF        | 1.96 (1.37-2.82) | <0.001 |
| DIAPH3     | 1.98 (1.38-2.83) | <0.001 |
| MTFR2      | 1.99 (1.39-2.85) | <0.001 |
| MK167      | 1.99 (1.39-2.85) | <0.001 |
| HELLS      | 2 (1.4-2.85)     | <0.001 |
| TESMIN     | 2.02 (1.41-2.9)  | <0.001 |
| AC087588.2 | 2.04 (1.42-2.93) | <0.001 |
| TRIP13     | 2.05 (1.43-2.95) | <0.001 |
| AL031777.1 | 2.06 (1.42-2.98) | <0.001 |
| CDC25C     | 2.07 (1.44-2.98) | <0.001 |
| C17orf53   | 2.09 (1.46-2.99) | <0.001 |
| KIF14      | 2.19 (1.53-3.14) | <0.001 |
| DNMT3B     | 2.23 (1.56-3.21) | <0.001 |

**Table S4.** Survival-related DEGs in TCGA-LUAD training cohort.

| Gene       | Coefficients |
|------------|--------------|
| HOXA11     | 0            |
| ABCC8      | 0            |
| SLC13A2    | 0            |
| CACNA2D2   | 0            |
| DLEC1      | 0            |
| NFIX       | 0            |
| RHOBTB2    | 0            |
| ANLN       | 0            |
| BRCA1      | 0            |
| NR1H4      | 0            |
| DEPDC1     | 0            |
| HSD17B6    | 0            |
| MUSK       | 0            |
| DEPDC1B    | 0            |
| MYOM2      | 0            |
| OTC        | 0            |
| LMO3       | 0            |
| GUCA1A     | 0            |
| ELN        | 0            |
| RAD51      | 0            |
| POLQ       | 0            |
| KCNQ1      | 0            |
| RASGRF1    | 0            |
| COL11A1    | 0            |
| MCM10      | 0            |
| ASPM       | 0            |
| PRR11      | 0            |
| PITX1      | 0            |
| ADGRF5     | 0            |
| GAL        | 0            |
| FGF10      | 0            |
| ST6GALNAC1 | 0            |
| TRIP13     | 0            |
| CYBRD1     | 0            |
| HMMR       | 0            |
| WSCD2      | 0            |
| GTSE1      | 0            |
| SPAG5      | 0            |
| RAP1GAP    | 0            |

|          |              |
|----------|--------------|
| UBE2T    | 0            |
| BPIFB2   | 0            |
| CLUL1    | 0            |
| TNS1     | 0            |
| EPHA6    | 0            |
| SCTR     | 0            |
| NDC80    | 0            |
| ORC1     | 0            |
| RAD54L   | 0            |
| AURKA    | 0            |
| DNMT3B   | 0            |
| TPX2     | 0            |
| F11      | 0            |
| BIRC5    | 0            |
| KIF4A    | 0            |
| ORC6     | 0            |
| CLSPN    | 0            |
| DPYSL2   | 0            |
| CDC45    | 0            |
| CRTAC1   | 0            |
| SERPIND1 | 0            |
| SUSD2    | 0            |
| SEC14L3  | 0            |
| PRODH    | 0            |
| PLA2G3   | 0            |
| CENPM    | 0            |
| POLE2    | 0            |
| CDKN3    | 0            |
| SLC8A3   | 0            |
| MYBL2    | 0            |
| E2F1     | 0            |
| FAM83D   | 0            |
| CHRD1    | 0            |
| BMX      | 0            |
| RS1      | 0            |
| GATA1    | 0            |
| FGF14    | 0            |
| CCL17    | 0            |
| CTSH     | 0            |
| OIP5     | 0            |
| MCM4     | 0            |
| ASF1B    | 0            |
| CCNE1    | 0            |
| SIGLEC6  | 0            |
| HOXA13   | 0            |
| TYRP1    | 0            |
| PTGDS    | 0            |
| SORCS1   | 0            |
| UBE2S    | 0            |
| HLF      | 0            |
| NEIL3    | 0            |
| NCAPG    | 0            |
| FOLR1    | 0            |
| FOXM1    | 0            |
| PRMT8    | 0            |
| RAD51AP1 | 0            |
| ART4     | 0            |
| MGP      | 0            |
| ADGRD1   | 0            |
| CDCA3    | 0            |
| PHACTR1  | 0            |
| FHL5     | 0            |
| CCR6     | -0.032977722 |
| TTK      | 0            |
| KIF20A   | 0            |
| POLR3G   | 0            |
| CNTN3    | 0            |
| VIPR1    | 0            |
| CENPA    | 0            |



|           |             |
|-----------|-------------|
| DLX2      | 0           |
| CD207     | 0           |
| NT5C1A    | 0           |
| ACTL8     | 0           |
| CDC20     | 0           |
| NEK2      | 0           |
| CENPF     | 0           |
| MUC5B     | 0           |
| KIF14     | 0           |
| C2orf40   | 0           |
| SLC46A2   | 0           |
| HELLS     | 0           |
| TBX4      | 0           |
| NCAPH     | 0           |
| MND1      | 0           |
| KIF18A    | 0           |
| TWIST1    | 0           |
| ZWINT     | 0           |
| CENPK     | 0           |
| STIL      | 0           |
| HJURP     | 0           |
| EDN3      | 0           |
| HIST1H2BJ | 0           |
| OR2B6     | 0           |
| EREG      | 0           |
| C17orf53  | 0           |
| FOSB      | 0           |
| FOXA2     | 0           |
| DLGAP5    | 0           |
| ATP13A4   | 0           |
| AUNIP     | 0           |
| PKMYT1    | 0           |
| VGf       | 0           |
| STRIP2    | 0           |
| PIMREG    | 0           |
| RNASE1    | 0           |
| SGO1      | 0           |
| OLFM1     | 0           |
| EDA2R     | 0           |
| C1QL1     | 0           |
| NAPSA     | 0           |
| PPP1R1B   | 0           |
| RAI2      | 0           |
| NR0B2     | 0           |
| ENAM      | 0           |
| TESMIN    | 0.002511291 |
| MYH11     | 0           |
| SFTPD     | 0           |
| PEBP4     | 0           |
| CCNB1     | 0           |
| CHIA      | 0           |
| PSRC1     | 0           |
| ADAMTS8   | 0           |
| ACRV1     | 0           |
| FAM189A2  | 0           |
| ADGRB3    | 0           |
| TROAP     | 0           |
| ESPL1     | 0           |
| BRIP1     | 0           |
| IL36RN    | 0           |
| BAAT      | 0           |
| NR5A1     | 0           |
| CTSV      | 0           |
| DSCC1     | 0           |
| ARHGEF39  | 0           |
| NUSAP1    | 0           |
| KIF23     | 0           |
| KNL1      | 0           |
| DNASE2B   | 0           |

|          |              |
|----------|--------------|
| KIF11    | 0            |
| CEP55    | 0            |
| PLA2G12B | 0            |
| DNA2     | 0            |
| FGF5     | 0            |
| CDKL2    | 0            |
| CENPE    | 0            |
| DIAPH3   | 0            |
| TICRR    | 0            |
| ABCC12   | -0.009507364 |
| ABCA8    | 0            |
| GREB1L   | 0            |
| SLC14A1  | 0            |
| STAC2    | 0            |
| PRDM16   | 0            |
| PLK4     | 0            |
| KIF2C    | 0            |
| CYP4B1   | 0            |
| NUF2     | 0            |
| DTL      | 0            |
| MALL     | 0            |
| CCDC150  | 0            |
| ITGA9    | 0            |
| ECE2     | 0            |
| CCNA2    | 0            |
| DAAM2    | 0            |
| HMGCLL1  | 0            |
| MTFR2    | 0            |
| CDCA5    | 0            |
| LANCL3   | 0            |
| RGS20    | 0            |
| GIN54    | 0            |
| FAM83A   | 0.026787288  |
| HMCN2    | 0            |
| MKI67    | 0            |
| GGTLC1   | 0            |
| MS4A2    | 0            |
| CHEK1    | 0            |
| SCN2B    | 0            |
| PCDH15   | 0            |
| ADRA2A   | 0            |
| NR3C2    | 0            |
| CENPU    | 0            |
| ASTN1    | 0            |
| TMEM163  | 0            |
| SPC25    | 0            |
| SPARCL1  | 0            |
| CLEC4F   | 0            |
| ADGRF4   | 0            |
| C16orf89 | 0            |
| ABI3BP   | 0            |
| PGM5     | 0            |
| SKA1     | 0            |
| EME1     | 0            |
| CA10     | 0            |
| GRIA1    | 0            |
| KCNS2    | 0            |
| FBXO43   | 0            |
| BUB1B    | 0            |
| CCNB2    | 0            |
| SLC34A2  | 0            |
| COLEC12  | 0            |
| CDC25C   | 0            |
| CD1A     | 0            |
| CD1C     | 0            |
| CD1B     | 0            |
| CD1E     | 0            |
| BTG2     | 0            |
| TEPP     | 0            |

|           |              |
|-----------|--------------|
| CPAMD8    | 0            |
| LY6K      | 0            |
| RECQL4    | 0            |
| RACGAP1   | 0            |
| SPC24     | 0            |
| TEDC2     | 0            |
| B3GALT2   | -0.039551547 |
| LRRC52    | 0            |
| PIGR      | 0            |
| CAPN13    | 0            |
| CFAP221   | 0            |
| HPGDS     | 0            |
| C1QTNF7   | 0            |
| LINC01116 | 0            |
| SGO2      | 0            |
| CPA3      | 0            |
| KIF15     | 0            |
| CLEC3B    | 0            |
| KLF15     | 0            |
| RFC4      | 0            |
| CDC25A    | 0            |
| POC1A     | 0            |
| MAD2L1    | 0            |
| SCGB3A2   | 0            |
| TERT      | 0            |
| PI16      | 0            |
| PTTG1     | 0            |
| SHH       | 0            |
| SHOC1     | 0            |
| VEGFD     | 0            |
| MELK      | 0            |
| SKA3      | 0            |
| DDIAS     | 0            |
| SLC18A2   | 0            |
| GFI1B     | 0            |
| VWA2      | 0            |
| E2F7      | 0            |
| RIC3      | 0            |
| TMEM130   | 0            |
| MFAP4     | 0            |
| PCLAF     | 0            |
| PLK1      | 0            |
| MS4A15    | 0            |
| ISLR2     | 0            |
| GGT6      | 0            |
| KLK11     | 0            |
| RCOR2     | 0            |
| TK1       | 0            |
| ABCA3     | 0            |
| PBK       | 0            |
| HIST1H1E  | 0            |
| CX3CR1    | 0            |
| SCNN1B    | 0            |
| SFTPC     | 0            |
| CAVIN2    | 0            |
| GBX2      | 0            |
| SFTPB     | 0            |
| PARM1     | 0            |
| RAB3B     | 0            |
| RSPO1     | 0            |
| GCSAML    | 0            |
| SHE       | 0            |
| P2RY12    | 0            |
| CKAP2L    | 0            |
| BUB1      | 0            |
| CDK1      | 0            |
| FOS       | 0            |
| CST5      | 0            |
| HSD17B13  | 0            |

|           |             |
|-----------|-------------|
| IRX1      | 0           |
| IRX2      | 0           |
| PLA2G1B   | 0           |
| SIGLEC17P | 0           |
| SHCBP1    | 0           |
| ESCO2     | 0           |
| TPPP      | 0           |
| KCND3     | 0           |
| MAP6      | 0           |
| DNAI2     | 0           |
| RRM2      | 0           |
| MTBP      | 0           |
| C5orf34   | 0           |
| NEGR1     | 0           |
| RCAN2     | 0           |
| MYEOV     | 0           |
| HPSE2     | 0           |
| XCR1      | 0           |
| HSPB7     | 0           |
| PIFO      | 0           |
| SLC16A11  | 0           |
| EXO1      | 0           |
| UBE2C     | 0           |
| CCNE2     | 0           |
| SCUBE2    | 0           |
| FOSL1     | 0.017665852 |
| PRIMA1    | 0           |
| RIMS2     | 0           |
| TYMS      | 0           |
| TYMSOS    | 0           |
| LINC00982 | 0           |
| HASPIN    | 0           |
| ZNF366    | 0           |
| AURKB     | 0           |
| KLHDC7A   | 0           |
| ALOX15B   | 0           |
| FCER1A    | 0           |
| ZSCAN4    | 0           |
| MAB21L1   | 0           |
| SHISA2    | 0           |
| OR51E1    | 0           |
| CHRM2     | 0           |
| PENK      | 0           |
| TMEM132E  | 0           |
| TMEM252   | 0           |
| KCNA4     | 0           |
| KPNA2     | 0           |
| C1orf116  | 0           |
| GPR19     | 0           |
| WT1-AS    | 0           |
| ACSM5     | 0           |
| TRAIP     | 0           |
| DUSP5P1   | 0.012717299 |
| TMPRSS2   | 0           |
| HIST2H2AB | 0           |
| SLIT3     | 0           |
| C14orf180 | 0           |
| CDCA2     | 0           |
| GALNT17   | 0           |
| PARPBP    | 0           |
| CYP4Z1    | 0           |
| KIF18B    | 0           |
| SAPCD2    | 0           |
| C5orf38   | 0           |
| HPDL      | 0           |
| MAGEE2    | 0           |
| MST1L     | 0           |
| ERCC6L    | 0           |
| LHFPL3    | 0           |

|            |              |
|------------|--------------|
| EIF4EBP1   | 0            |
| FAM72B     | 0            |
| ADRB3      | 0            |
| PRELP      | 0            |
| DPPA3P2    | -0.042453178 |
| SBSN       | 0            |
| FAM111B    | 0            |
| MAOA       | 0            |
| KIAA0408   | 0            |
| CXCL17     | 0            |
| COLCA1     | 0            |
| FAM72A     | 0            |
| XRCC2      | 0            |
| TPSB2      | 0            |
| RAD54B     | 0            |
| CLEC9A     | 0            |
| WDHD1      | 0            |
| ARHGAP11A  | 0            |
| PRC1       | 0            |
| CSAG1      | 0            |
| CENPW      | 0            |
| CHIAP2     | 0            |
| AGER       | 0            |
| SLC44A4    | 0            |
| ADGRF5P2   | 0            |
| FAM83A-AS1 | 0            |
| ZDHC11B    | 0            |
| MIR27A     | 0            |
| LPAL2      | 0            |
| SEC14L6    | -0.000163888 |
| C10orf105  | 0            |
| FAM72D     | 0            |
| AL031777.1 | 0.00083617   |
| LINC01644  | 0            |
| RN7SKP51   | 0            |
| AC005165.1 | 0            |
| HAGLR      | 0            |
| FDPSP8     | 0            |
| LHFPL3-AS2 | 0            |
| SFTA1P     | 0            |
| CADM3-AS1  | 0            |
| LINC02519  | 0            |
| AL008733.1 | 0            |
| MIR663AHG  | 0            |
| AC010998.1 | 0            |
| AC005042.1 | 0            |
| ATP5MC1P4  | 0.010376482  |
| STEAP2-AS1 | 0            |
| LINC02038  | 0            |
| ITGB1-DT   | 0            |
| NPM1P9     | 0            |
| RPL13AP17  | 0            |
| LINC01750  | 0            |
| LINC01819  | 0            |
| AC112907.2 | 0            |
| ELN-AS1    | 0            |
| AC006329.1 | 0            |
| AL138789.1 | 0            |
| AC004947.1 | 0            |
| AL390778.2 | 0            |
| UBE2SP1    | 0            |
| AL157895.1 | 0            |
| PCMTD1P3   | 0            |
| SEPT14P12  | 0            |
| LINC01936  | 0            |
| AL133466.1 | 0            |
| AC091806.1 | 0            |
| AC096531.2 | 0            |
| LRRC52-AS1 | 0            |

|             |              |
|-------------|--------------|
| KIFC1       | 0            |
| PNMA2       | 0            |
| SYNPR-AS1   | 0            |
| INMT        | 0            |
| ADAMTS9-AS2 | 0            |
| RPS29P11    | 0            |
| RN7SL8P     | 0            |
| ECEL1P2     | 0            |
| ERVFRD-1    | 0            |
| LINC01213   | 0            |
| C4A         | 0            |
| DRAIC       | 0            |
| AC093772.1  | 0            |
| AC133963.1  | -0.02884125  |
| AC037441.1  | -0.028155115 |
| AC027627.1  | 0            |
| AC093523.1  | 0            |
| BRD9P2      | -0.030238138 |
| SELENOP     | 0            |
| AC068228.1  | 0            |
| AC046195.1  | 0            |
| AC012213.1  | 0            |
| INMT-MINDY4 | 0            |
| AC090092.1  | 0            |
| AP003064.2  | 0            |
| AC145124.1  | 0            |
| AP004608.1  | 0            |
| RAB44       | 0            |
| AC073585.1  | 0            |
| RMST        | 0            |
| CYP2A6      | 0            |
| ADGRD1-AS1  | 0            |
| CYP2B7P     | 0            |
| AC112777.1  | 0            |
| AC007207.2  | 0            |
| MKRN9P      | 0            |
| AC012085.2  | 0            |
| AC104035.1  | 0            |
| AL162511.1  | 0            |
| FPGT-TNNI3K | 0            |
| PTCSC3      | 0            |
| LINC02323   | 0            |
| LINC02568   | 0            |
| SLC22A31    | 0            |
| LINC00261   | 0            |
| AC022164.1  | 0            |
| ADAMTS7P3   | 0            |
| LINC02133   | 0            |
| FAM72C      | 0            |
| MIR3189     | 0            |
| AC099850.3  | 0            |
| AP002478.1  | 0.000310756  |
| GDF10       | 0            |
| AC023421.1  | 0            |
| LCN6        | 0            |
| AC005884.1  | 0            |
| AC016205.1  | 0            |
| CYP4F24P    | 0            |
| AC008878.3  | 0            |
| AC092071.1  | 0            |
| GAS2L2      | 0            |
| AP000526.1  | 0            |
| AC105254.2  | 0            |
| AC016877.3  | 0            |
| AC012073.1  | 0            |
| AP003481.1  | 0            |
| AC236972.3  | 0            |
| AL135999.3  | 0            |
| AC007671.1  | 0            |

|            |              |
|------------|--------------|
| HIST1H2BO  | 0            |
| AC087588.2 | 0.004673826  |
| AL445493.3 | 0            |
| FCGBP      | 0            |
| AL355974.2 | 0            |
| UHRF1      | 0            |
| GGTLC5P    | 0            |
| CCL14      | 0            |
| HIST1H2AL  | 0            |
| HIST1H4D   | 0            |
| HIST1H2BF  | 0            |
| GPIHBP1    | 0            |
| FO681492.1 | 0            |
| HIST1H3F   | 0            |
| HIST1H2AM  | 0            |
| AC006994.2 | 0            |
| AC073862.2 | 0            |
| AC078925.4 | 0            |
| PCDH20     | 0            |
| AC073862.5 | 0            |
| MIR4697HG  | 0            |
| AC004947.2 | -0.007125174 |

**Table S5.** The coefficients of each survival-related DEG by LASSO analysis.
